# Supplementary material for: Comparative safety of serotonin (5-HT3) receptor antagonists in patients undergoing surgery: a systematic review and network meta-analysis
Source: Springer Nature journal article supplement (doi:10.1186/s12916-015-0379-3), 2015-06-16
Supplement: MOESM1 [file 9758908]

## **APPENDICES 1-17**

|                                                                                                                                       |           |
|---------------------------------------------------------------------------------------------------------------------------------------|-----------|
| <b>Appendix 1. Inclusion criteria for interventions and comparator groups.....</b>                                                    | <b>2</b>  |
| <b>Appendix 2. Study characteristics .....</b>                                                                                        | <b>3</b>  |
| <b>Appendix 3. Frequencies for specific drugs and drug combinations .....</b>                                                         | <b>8</b>  |
| <b>Appendix 4. Patient characteristics.....</b>                                                                                       | <b>9</b>  |
| <b>Appendix 5. Cochrane EPOC Risk-of-bias appraisal results .....</b>                                                                 | <b>13</b> |
| <b>Appendix 6. Aggregate EPOC risk-of-bias appraisal results .....</b>                                                                | <b>16</b> |
| <b>Appendix 7. McHarm appraisal results.....</b>                                                                                      | <b>17</b> |
| <b>Appendix 8. Aggregate McHarm appraisal results .....</b>                                                                           | <b>19</b> |
| <b>Appendix 9 Comparison adjusted funnel plots .....</b>                                                                              | <b>20</b> |
| <b>Appendix 10. Definitions of arrhythmia .....</b>                                                                                   | <b>21</b> |
| <b>Appendix 11. Network meta-analysis for all outcomes for all time periods .....</b>                                                 | <b>22</b> |
| <b>Appendix 12. Plot of the surface under the cumulative ranking (SUCRA) curves for the 9 treatments included in Arrhythmia. ....</b> | <b>24</b> |
| <b>Appendix 13: Subgroup analysis for Arrhythmia and Delirium.....</b>                                                                | <b>25</b> |
| <b>Appendix 14. Network meta-analysis results for Delirium. ....</b>                                                                  | <b>28</b> |
| <b>Appendix 15. Definitions of delirium .....</b>                                                                                     | <b>29</b> |
| <b>Appendix 16. Plot of the surface under the cumulative ranking (SUCRA) curves for the 6 treatments included in Delirium.....</b>    | <b>30</b> |
| <b>Appendix 17. Included studies in our review versus previous systematic reviews .....</b>                                           | <b>31</b> |

**Appendix 1. Inclusion criteria for interventions and comparator groups**

|                                                                                                                                                                              |                                                                                                                                                                                                                                                                                                                                                                                                                                                                                           |                                                                |                                                                  |                                                                    |                                             |
|------------------------------------------------------------------------------------------------------------------------------------------------------------------------------|-------------------------------------------------------------------------------------------------------------------------------------------------------------------------------------------------------------------------------------------------------------------------------------------------------------------------------------------------------------------------------------------------------------------------------------------------------------------------------------------|----------------------------------------------------------------|------------------------------------------------------------------|--------------------------------------------------------------------|---------------------------------------------|
| <p><b>Intervention:</b></p> <p>5-HT3 receptor antagonist with or without dexamethasone<br/>(Ondansetron, Granisetron, Dolasetron, Tropisetron, Ramosetron, Palonosetron)</p> | <p><b>Eligible comparators:</b></p> <p>I. Different 5-HT3 antagonist with or without Dexamethasone</p> <p>II. Antiemetic comparator listed below with or without Dexamethasone</p> <p>III. Same 5-HT3 antagonist given at different dose, formula, and/or timing or same 5-HT3 with Dexamethasone</p> <p>IV. Same 5-HT3 antagonist given in combination with one of the comparators below</p> <p>V. Different 5-HT3 antagonist given in combination with one of the comparators below</p> |                                                                |                                                                  |                                                                    |                                             |
| <p><b>Antiemetic comparators included:</b></p>                                                                                                                               |                                                                                                                                                                                                                                                                                                                                                                                                                                                                                           |                                                                |                                                                  |                                                                    |                                             |
| <p><b>Benzamides</b></p> <p>Metoclopramide</p>                                                                                                                               | <p><b>Phenothiazine</b></p> <p>Perphenazine<br/>Promethazine</p>                                                                                                                                                                                                                                                                                                                                                                                                                          | <p><b>Butyrophenones</b></p> <p>Haloperidol<br/>Droperidol</p> | <p><b>Antihistamines</b></p> <p>Dimenhydrinate<br/>Cyclizine</p> | <p><b>NK-1</b></p> <p>Aprepitant<br/>Casopitant<br/>Rolapitant</p> | <p><b>Steroids</b></p> <p>Dexamethasone</p> |
| <p><b>Abbreviations:</b> 5-HT3, Serotonin; NK-, Neurokinin-1 receptor antagonists; NaSSA, Noradrenergic and specific serotonergic antidepressant.</p>                        |                                                                                                                                                                                                                                                                                                                                                                                                                                                                                           |                                                                |                                                                  |                                                                    |                                             |

## Appendix 2. Study characteristics

| Author, year                              | Country of conduct                             | Study conduct period           | Study duration (hours) | Setting      | Interventions examined                                                  | Outcomes Reported       |
|-------------------------------------------|------------------------------------------------|--------------------------------|------------------------|--------------|-------------------------------------------------------------------------|-------------------------|
| <i>Randomized clinical trials (n=112)</i> |                                                |                                |                        |              |                                                                         |                         |
| Choi, 2012                                | South Korea                                    | NR                             | 48                     | NR           | Ondansetron + Dexamethasone, Ramosetron + Dexamethasone                 | Mortality               |
| Wang, 2012                                | China (Taiwan)                                 | NR                             | 24                     | NR           | Dexamethasone, Haloperidol + Dexamethasone, Ondansetron + Dexamethasone | QT Interval, Arrhythmia |
| Ekinci, 2011                              | Turkey                                         | February 2007 - March 2008     | 48                     | NR           | Droperidol, Metoclopramide, Ondansetron, Placebo, Tropisetron           | Arrhythmia              |
| El-deeb, 2011b                            | Egypt                                          | NR                             | 24                     | NR           | Granisetron + Dexamethasone, Placebo                                    | Arrhythmia              |
| Gan, 2011                                 | USA, Canada                                    | NR                             | 119                    | NR           | Ondansetron, Placebo, Rolapitant                                        | Mortality               |
| Gupta, 2011                               | India                                          | October 2008 - April 2009      | NR                     | Hospital     | Ondansetron, Placebo                                                    | QT Interval             |
| Park, 2011                                | Republic of Korea                              | June 2010 - September 2010     | 24                     | Hospital     | Ondansetron, Palonosetron                                               | Mortality               |
| Ryu, 2011                                 | South Korea                                    | NR                             | 48                     | NR           | Ramosetron, Tropisetron                                                 | QT Interval             |
| Sahoo, 2011                               | India                                          | September 2008 - December 2008 | 1                      | NR           | Ondansetron, Placebo                                                    | Arrhythmia              |
| Bilgin, 2010                              | Turkey                                         | NR                             | 24                     | NR           | Dexamethasone, Metoclopramide, Ondansetron, Placebo                     | Mortality               |
| Choi, 2010                                | Korea                                          | September 2008 - February 2009 | 48                     | NR           | Ondansetron, Placebo, Ramosetron                                        | Arrhythmia              |
| Jee, 2010                                 | Korea                                          | NR                             | 36                     | NR           | Metoclopramide + Dexamethasone, Ondansetron + Dexamethasone             | Delirium, Arrhythmia    |
| Jokela, 2010                              | Finland                                        | December 2007 - January 2009   | 24                     | Hospital     | Ondansetron, Placebo                                                    | Delirium                |
| Mehta, 2010                               | Canada                                         | February 2008 - March 2009     | 2                      | NR           | Droperidol, Ondansetron, Ondansetron + Droperidol, Placebo              | QT Interval             |
| Shakya, 2010                              | India                                          | NR                             | 2                      | NR           | Ondansetron, Placebo                                                    | Delirium                |
| Singla, 2010                              | Belgium, Canada, Germany, Hungary, Spain, USA. | NR                             | 119                    | Multi-centre | Casopitant, Ondansetron, Ondansetron + Casopitant                       | Mortality               |
| Feng, 2009                                | Taiwan                                         | NR                             | 24                     | NR           | Haloperidol, Ondansetron, Ondansetron + Haloperidol                     | QT Interval             |
| Jain, 2009                                | India                                          | NR                             | 24                     | NR           | Granisetron, Ondansetron, Placebo                                       | Delirium                |

|                               |                                                                                   |                                         |      |                |                                                                                            |                            |
|-------------------------------|-----------------------------------------------------------------------------------|-----------------------------------------|------|----------------|--------------------------------------------------------------------------------------------|----------------------------|
| Riad, 2009                    | Saudi Arabia                                                                      | NR                                      | 24   | NR             | Granisetron +<br>Dexamethasone,<br>Ondansetron +<br>Dexamethasone,<br>Placebo              | Arrhythmia                 |
| Rosow, 2009                   | USA                                                                               | NR                                      | NR   | Hospital       | Haloperidol,<br>Ondansetron                                                                | Delirium, QT<br>Interval   |
| Candiotti, 2008               | USA, Romainia                                                                     | NR                                      | 72   | NR             | Palonosetron, Placebo                                                                      | Mortality, QT<br>Interval  |
| Choi, 2008                    | South Korea                                                                       | September<br>2006 - June<br>2007        | 48   | NR             | Ondansetron,<br>Ramosetron                                                                 | Mortality                  |
| Contreras-<br>Dominguez, 2008 | Chile                                                                             | December<br>2003 -<br>February<br>2006  | 48   | Hospital       | Dexamethasone,<br>Droperidol,<br>Granisetron,<br>Metoclopramide,<br>Placebo, Tropisetron   | Arrhythmia                 |
| Kovac, 2008                   | Germany, Poland,<br>Czech Republic                                                | NR                                      | 72   | Multi-centre   | Palonosetron, Placebo                                                                      | Mortality, QT<br>Interval  |
| Owczuk, 2008                  | Poland                                                                            | NR                                      | 0    | NR             | Ondansetron, Placebo                                                                       | Arrhythmia                 |
| Piper, 2008                   | Germany,<br>Switzerland                                                           | 1999 - 2004                             | 24   | NR             | Dolsetron, Droperidol,<br>Placebo                                                          | Delirium,<br>Arrhythmia    |
| Said-Ahmed,<br>2008           | Egypt                                                                             | NR                                      | 24   | NR             | Granisetron, Placebo                                                                       | Arrhythmia                 |
| Bestas, 2007                  | Turkey                                                                            | NR                                      | 24   | Medical center | Granisetron,<br>Ondansetron, Placebo                                                       | Mortality                  |
| Diemunsch, 2007               | North America<br>(including USA),<br>South America,<br>Europe, Australia,<br>Asia | May 2004 -<br>April 2005                | 48   | NR             | Aprepitant,<br>Ondansetron                                                                 | QT Interval,<br>Arrhythmia |
| Gan, 2007                     | Multicentred                                                                      | September<br>2003 -<br>November<br>2004 | 48   | NR             | Aprepitant,<br>Ondansetron                                                                 | QT Interval                |
| Han, 2007                     | Korea                                                                             | NR                                      | 48   | NR             | Ondansetron                                                                                | Arrhythmia                 |
| Lee, 2007                     | Republic of China<br>(Taiwan)                                                     | NR                                      | 24   | NR             | Haloperidol,<br>Ondansetron                                                                | QT Interval,<br>Arrhythmia |
| Oksuz, 2007                   | Turkey                                                                            | NR                                      | 24   | NR             | Granisetron,<br>Metoclopramide,<br>Ondansetron                                             | Mortality                  |
| Rusch, 2007                   | Germany                                                                           | NR                                      | 24   | Hospital       | Dolsetron, Dolsetron +<br>Dexamethasone,<br>Haloperidol,<br>Haloperidol +<br>Dexamethasone | Delirium                   |
| Sagir, 2007                   | Turkey                                                                            | NR                                      | 0.25 | NR             | Granisetron, Placebo                                                                       | Delirium                   |
| Sandhu, 2007                  | Thailand                                                                          | NR                                      | 24   | NR             | Metoclopramide,<br>Ondansetron                                                             | Mortality                  |
| Siddik-Sayyid,<br>2007        | Lebanon                                                                           | NR                                      | 24   | Medical center | Granisetron,<br>Ondansetron, Placebo                                                       | Arrhythmia                 |
| Bridge, 2006                  | USA                                                                               | NR                                      | 24   | Hospital       | Dolsetron,<br>Granisetron,<br>Ondansetron                                                  | Mortality                  |
| Chan, 2006                    | USA, Hong Kong,<br>New Zeland                                                     | September<br>2002 - June<br>2004        | 48   | NR             | Droperidol,<br>Ondansetron,<br>Ondansetron +<br>Droperidol, Placebo                        | Arrhythmia                 |
| Kelsaka, 2006                 | Turkey                                                                            | NR                                      | NR   | NR             | Ondansetron, Placebo                                                                       | Arrhythmia                 |
| Sarvela, 2006                 | Finland                                                                           | January 2003<br>- November<br>2003      | 24   | NR             | Ondansetron, Placebo,<br>Tropisetron                                                       | Delirium                   |
| Tosun, 2006                   | Turkey                                                                            | NR                                      | 24   | NR             | Placebo, Tropisetron                                                                       | Delirium                   |
| D'Angelo, 2005                | USA                                                                               | March 2002<br>- August<br>2002          | 24   | Multi-centre   | Granisetron, Placebo                                                                       | Mortality                  |
| Gan, 2005                     | USA                                                                               | NR                                      | 24   | NR             | Granisetron +<br>Dexamethasone,                                                            | Mortality,<br>Arrhythmia   |

|                                   |                                                   |                                 |    |              |                                                                                                                                                   |                         |
|-----------------------------------|---------------------------------------------------|---------------------------------|----|--------------|---------------------------------------------------------------------------------------------------------------------------------------------------|-------------------------|
|                                   |                                                   |                                 |    |              | Ondansetron +<br>Dexamethasone                                                                                                                    |                         |
| Khalil, 2005                      | USA, Canada                                       | NR                              | 24 | Multi-centre | Ondansetron, Placebo                                                                                                                              | Delirium,<br>Arrhythmia |
| Kocamanoglu,<br>2005              | Turkey                                            | NR                              | 24 | NR           | Droperidol,<br>Granisetron,<br>Granisetron +<br>Dexamethasone,<br>Granisetron +<br>Droperidol, Placebo                                            | Mortality               |
| Kontrimaviciute,<br>2005          | Lithuania                                         | NR                              | 24 | Hospital     | Ondansetron, Placebo                                                                                                                              | Arrhythmia              |
| Pirat, 2005                       | Turkey                                            | NR                              | 24 | NR           | Ondansetron, Placebo                                                                                                                              | Arrhythmia              |
| Treschan, 2005                    | Germany                                           | NR                              | 24 | NR           | Ondansetron, Placebo                                                                                                                              | Arrhythmia              |
| White, 2005 <sup>†</sup>          | USA                                               | NR                              | 24 | NR           | Palonosetron, Placebo                                                                                                                             | QT Interval             |
| Apfel, 2004 (CR:<br>Jokela, 2009) | Germany, USA,<br>Finland, UK,<br>Turkey, Slovakia | February<br>2000 - July<br>2002 | 24 | NR           | Dexamethasone,<br>Droperidol,<br>Droperidol +<br>Dexamethasone,<br>Ondansetron,<br>Ondansetron +<br>Dexamethasone,<br>Ondansetron +<br>Droperidol | QT Interval             |
| Binstock, 2004                    | USA                                               | NR                              | 24 | NR           | Ondansetron, Placebo                                                                                                                              | Arrhythmia              |
| Eberhart, 2004                    | Germany                                           | NR                              | 24 | NR           | Dolsetron, Dolsetron +<br>Droperidol,<br>Droperidol, Placebo                                                                                      | Arrhythmia              |
| Hanaoka, 2004                     | Japan                                             | NR                              | 24 | Multi-centre | Granisetron, Placebo                                                                                                                              | Arrhythmia              |
| Samakarndi, 2004                  | Saudi Arabia                                      | NR                              | 24 | NR           | Dexamethasone,<br>Ondansetron,<br>Ondansetron +<br>Dexamethasone,<br>Placebo                                                                      | Arrhythmia              |
| Charuluxananan,<br>2003           | Thailand                                          | NR                              | 24 | Hospital     | Ondansetron, Placebo                                                                                                                              | Arrhythmia              |
| Loewen, 2003                      | Canada                                            | May 2000 -<br>December<br>2001  | 24 | NR           | Dolsetron, Droperidol                                                                                                                             | Delirium                |
| O'Brien, 2003                     | UK                                                | NR                              | 24 | Hospital     | Cyclizine,<br>Ondansetron, Placebo                                                                                                                | Arrhythmia              |
| Argiriadou, 2002                  | Greece                                            | NR                              | 12 | Hospital     | Ondansetron, Placebo,<br>Tropisetron                                                                                                              | Arrhythmia              |
| Gurkan, 2002                      | Turkey                                            | NR                              | 6  | NR           | Ondansetron, Placebo                                                                                                                              | Arrhythmia              |
| Dabbous, 2001                     | Lebanon                                           | NR                              | 24 | NR           | Droperidol,<br>Metoclopramide,<br>Ondansetron                                                                                                     | Delirium                |
| Kathirvel, 2001                   | India                                             | NR                              | 24 | NR           | Ondansetron, Placebo                                                                                                                              | Delirium                |
| Subramaniam,<br>2001              | India                                             | NR                              | 24 | NR           | Dexamethasone,<br>Ondansetron, Placebo                                                                                                            | Arrhythmia              |
| Ahmed, 2000                       | UK                                                | NR                              | 24 | NR           | Ondansetron,<br>Ondansetron +<br>Cyclizine, Placebo                                                                                               | Arrhythmia              |
| Charuluxananan,<br>2000           | Thailand                                          | NR                              | 4  | Hospital     | Ondansetron, Placebo                                                                                                                              | Delirium                |
| Jensen, 2000                      | australia                                         | NR                              | 24 | Hospital     | Placebo, Tropisetron                                                                                                                              | Delirium                |
| Kreisler, 2000                    | USA                                               | NR                              | 24 | NR           | Droperidol,<br>Ondansetron,<br>Promethazine                                                                                                       | Delirium                |
| Philip, 2000                      | USA                                               | NR                              | 24 | Multi-centre | Dolsetron, Placebo                                                                                                                                | Arrhythmia              |
| Zarate, 2000                      | USA                                               | NR                              | 24 | NR           | Dolsetron,<br>Ondansetron                                                                                                                         | Delirium                |
| Koivuranta, 1999                  | Finland                                           | NR                              | 24 | Hospital     | Ondansetron,<br>Tropisetron                                                                                                                       | Delirium                |
| McCall, 1999                      | USA                                               | NR                              | 8  | NR           | Dimenhydrinate,<br>Ondansetron, Placebo                                                                                                           | Delirium                |
| Sinha, 1999                       | India                                             | NR                              | 48 | Hospital     | Ondansetron, Placebo                                                                                                                              | Delirium                |
| Tsui, 1999                        | China                                             | NR                              | 48 | Hospital     | Ondansetron, Placebo,                                                                                                                             | Mortality               |

|                                     |                                                                                                                               |    |     |              |  |                                                                         |                            |
|-------------------------------------|-------------------------------------------------------------------------------------------------------------------------------|----|-----|--------------|--|-------------------------------------------------------------------------|----------------------------|
|                                     |                                                                                                                               |    |     |              |  | Tropisetron                                                             |                            |
| Diemunsch, 1998                     | France                                                                                                                        | NR | 24  | NR           |  | Dolsetron, Placebo                                                      | Arrhythmia                 |
| Goodarzi, 1998                      | USA                                                                                                                           | NR | 48  | NR           |  | Droperidol,<br>Ondansetron, Placebo                                     | Mortality                  |
| Hamid, 1998                         | Canada                                                                                                                        | NR | 24  | NR           |  | Dimenhydrinate,<br>Ondansetron, Placebo                                 | Arrhythmia                 |
| Morris, 1998                        | Australia, Canada,<br>Denmark, France,<br>Germany, Iceland,<br>Israel, Netherlands,<br>Norway, South<br>Africa, Sweden,<br>UK | NR | 24  | Multi-centre |  | Metoclopramide,<br>Ondansetron, Placebo                                 | Mortality                  |
| Scholz, 1998                        | Germany                                                                                                                       | NR | 24  | NR           |  | Ondansetron, Placebo,<br>Tropisetron                                    | Arrhythmia                 |
| Tramer, 1998                        | Switzerland                                                                                                                   | NR | 48  | Hospital     |  | Ondansetron, Placebo                                                    | Arrhythmia                 |
| Diemunsch,<br>1997b                 | France                                                                                                                        | NR | 24  | NR           |  | Dolsetron, Placebo                                                      | Arrhythmia                 |
| Diemunsch,<br>1997c                 | Europe                                                                                                                        | NR | 24  | NR           |  | Dolsetron, Placebo                                                      | Arrhythmia,<br>Mortality   |
| Graczyk, 1997                       | USA                                                                                                                           | NR | 24  | NR           |  | Dolsetron, Placebo                                                      | QT Interval                |
| Klockgether-<br>Radke, 1997         | Germany                                                                                                                       | NR | 24  | NR           |  | Droperidol,<br>Ondansetron, Placebo                                     | Arrhythmia                 |
| Koivuranta, 1997                    | Finland                                                                                                                       | NR | 24  | Hospital     |  | Droperidol,<br>Ondansetron, Placebo                                     | Delirium                   |
| Korttila, 1997                      | finland                                                                                                                       | NR | 24  | Multi-centre |  | Dolsetron,<br>Ondansetron, Placebo                                      | Arrhythmia                 |
| Kovac, 1997                         | USA                                                                                                                           | NR | 24  | NR           |  | Dolsetron, Placebo                                                      | QT Interval                |
| Mikawa, 1997                        | Japan                                                                                                                         | NR | 24  | NR           |  | Granisetron, Placebo                                                    | Arrhythmia                 |
| Monagle, 1997                       | Australia                                                                                                                     | NR | 24  | NR           |  | Metoclopramide,<br>Ondansetron                                          | Arrhythmia                 |
| Morton, 1997                        | Denmark, Sweden,<br>UK, France,<br>Belgium,<br>Germany, Norway.                                                               | NR | 24  | Multi-centre |  | Ondansetron, Placebo                                                    | Arrhythmia                 |
| Patel, 1997                         | USA                                                                                                                           | NR | 24  | Multi-centre |  | Ondansetron, Placebo                                                    | Delirium                   |
| Purhonen, 1997                      | Finland                                                                                                                       | NR | 48  | Hospital     |  | Droperidol, Placebo,<br>Tropisetron                                     | Arrhythmia                 |
| Rung, 1997                          | USA                                                                                                                           | NR | 24  | Multi-centre |  | Ondansetron, Placebo                                                    | Mortality                  |
| Scuderi, 1997                       | USA                                                                                                                           | NR | 24  | NR           |  | Droperidol,<br>Metoclopramide,<br>Ondansetron, Placebo                  | Arrhythmia                 |
| Taylor, 1997                        | UK                                                                                                                            | NR | 144 | Multi-centre |  | Granisetron, Placebo                                                    | Mortality,<br>Arrhythmia   |
| Ulusoy, 1997                        | Turkey                                                                                                                        | nr | 24  | Hospital     |  | Ondansetron, Placebo                                                    | Delirium                   |
| Warriner, 1997                      | Canada                                                                                                                        | NR | 24  | Multi-centre |  | Dolsetron, Placebo                                                      | Mortality,<br>Arrhythmia   |
| Ali-melkkila,<br>1996               | Finland                                                                                                                       | NR | 24  | Hospital     |  | Metoclopramide,<br>Placebo, Tropisetron                                 | Mortality                  |
| Capouet, 1996                       | Belgium                                                                                                                       | NR | 24  | Multi-centre |  | Placebo, Tropisetron                                                    | QT Interval,<br>Arrhythmia |
| Kovac, 1996 (CR:<br>Pearman, 1994c) | USA                                                                                                                           | NR | 24  | NR           |  | Ondansetron, Placebo                                                    | Delirium                   |
| Naguib, 1996                        | Saudi Arabia                                                                                                                  | NR | 24  | NR           |  | Granisetron,<br>Metoclopramide,<br>Ondansetron, Placebo,<br>Tropisetron | Mortality                  |
| Rose, 1996a                         | USA                                                                                                                           | NR | 24  | NR           |  | Ondansetron, Placebo                                                    | Mortality                  |
| Desilva, 1995                       | USA                                                                                                                           | NR | 4   | NR           |  | Droperidol,<br>Metoclopramide,<br>Ondansetron,<br>Perphenazine, Placebo | Delirium                   |
| Litman, 1995                        | USA                                                                                                                           | NR | 24  | Hospital     |  | Droperidol,<br>Ondansetron                                              | Delirium                   |
| Paech, 1995                         | Australia                                                                                                                     | NR | 24  | Hospital     |  | Droperidol,<br>Ondansetron, Placebo                                     | Delirium                   |
| Paxton, 1995a                       | Ireland                                                                                                                       | NR | 24  | NR           |  | Droperidol,<br>Ondansetron, Placebo                                     | Arrhythmia                 |

|                                                                                                                 |                                                                  |    |    |                   |                                                        |                                   |
|-----------------------------------------------------------------------------------------------------------------|------------------------------------------------------------------|----|----|-------------------|--------------------------------------------------------|-----------------------------------|
| Kaufmann, 1994                                                                                                  | Switzerland, USA                                                 | NR | 35 | NR                | Droperidol,<br>Metoclopramide,<br>Placebo, Tropisetron | Delirium                          |
| Ummerhofer, 1994                                                                                                | Switzerland                                                      | NR | 24 | Hospital          | Ondansetron, Placebo                                   | Delirium                          |
| Dupeyron, 1993                                                                                                  | Belgium,<br>Denmark, France                                      | NR | 24 | NR                | Ondansetron, Placebo                                   | Arrhythmia                        |
| Helmers, 1993                                                                                                   | Netherlands,<br>Ireland, Sweden,<br>UK, South Africa,<br>France, | NR | 24 | NR                | Ondansetron, Placebo                                   | Mortality,<br>Arrhythmia          |
| Raphael, 1993                                                                                                   | UK                                                               | NR | 24 | NR                | Metoclopramide,<br>Ondansetron                         | Delirium                          |
| Du Pen, 1992<br>(CR: Scuderi,<br>1993)                                                                          | USA                                                              | NR | 24 | Multi-centre      | Ondansetron, Placebo                                   | Delirium                          |
| Kovac, 1992<br>(CRs: McKenzie,<br>1993a; Pearman,<br>1994a)                                                     | USA                                                              | NR | 24 | Multi-centre      | Ondansetron, Placebo                                   | Delirium                          |
| <i>Non-randomized clinical trials (n=2)</i>                                                                     |                                                                  |    |    |                   |                                                        |                                   |
| Charbit, 2005                                                                                                   | France                                                           | NR | 3  | Hospital          | Droperidol,<br>Ondansetron                             | QT<br>prolongation,<br>Arrhythmia |
| Lerman, 1996                                                                                                    | Canada                                                           | NR | 24 | Hospital          | Dolasetron                                             | QT<br>prolongation                |
| <i>Controlled before-after studies (n=1)</i>                                                                    |                                                                  |    |    |                   |                                                        |                                   |
| Wagner, 2007                                                                                                    | USA                                                              | NR | 24 | Medical<br>center | Ondansetron, Placebo                                   | Delirium                          |
| <i>Cohort studies (n=0)</i>                                                                                     |                                                                  |    |    |                   |                                                        |                                   |
| <b>Note:</b> †Unpublished data (White, 2005).                                                                   |                                                                  |    |    |                   |                                                        |                                   |
| <b>Abbreviations:</b> CR, companion report; NR, not reported; UK, United Kingdom; USA United States of America. |                                                                  |    |    |                   |                                                        |                                   |

### Appendix 3. Frequencies for specific drugs and drug combinations

| <i>Intervention/ Comparator:</i> | <b>% of arms (n=367)</b> | <b>% of studies (n=115)</b> |
|----------------------------------|--------------------------|-----------------------------|
| Ondansetron                      | 26.16                    | 68.7                        |
| Placebo                          | 23.71                    | 74.78                       |
| Dolasetron                       | 10.62                    | 13.04                       |
| Granisetron                      | 5.99                     | 12.17                       |
| Droperidol                       | 5.72                     | 20                          |
| Tropisetron                      | 5.45                     | 13.04                       |
| Metoclopramide                   | 3.81                     | 12.17                       |
| Palonosetron                     | 3.27                     | 3.48                        |
| Ondansetron + Dexamethasone      | 1.91                     | 6.09                        |
| Dexamethasone                    | 1.63                     | 5.22                        |
| Ramosetron                       | 1.36                     | 2.61                        |
| Aprepitant                       | 1.09                     | 1.74                        |
| Granisetron + Dexamethasone      | 1.09                     | 3.48                        |
| Haloperidol                      | 1.09                     | 3.48                        |
| Rolapitant                       | 1.09                     | 0.87                        |
| Ondansetron + Casopitant         | 0.82                     | 0.87                        |
| Ondansetron + Droperidol         | 0.82                     | 2.61                        |
| Dimenhydrinate                   | 0.54                     | 1.74                        |
| Haloperidol + Dexamethasone      | 0.54                     | 1.74                        |
| Casopitant                       | 0.27                     | 0.87                        |
| Cyclizine                        | 0.27                     | 0.87                        |
| Dolasetron + Dexamethasone       | 0.27                     | 0.87                        |
| Dolasetron + Droperidol          | 0.27                     | 0.87                        |
| Droperidol + Dexamethasone       | 0.27                     | 0.87                        |
| Granisetron + Droperidol         | 0.27                     | 0.87                        |
| Metoclopramide + Dexamethasone   | 0.27                     | 0.87                        |
| Ondansetron + Cyclizine          | 0.27                     | 0.87                        |
| Ondansetron + Haloperidol        | 0.27                     | 0.87                        |
| Perphenazine                     | 0.27                     | 0.87                        |
| Promethazine                     | 0.27                     | 0.87                        |
| Ramosetron + Dexamethasone       | 0.27                     | 0.87                        |



#### Appendix 4. Patient characteristics

| Author, year                              | Sample size | Age Category     | % female | ASA status     | Surgery type                                                       | H/o motion sickness | H/o PONV | Comorbidities                 |
|-------------------------------------------|-------------|------------------|----------|----------------|--------------------------------------------------------------------|---------------------|----------|-------------------------------|
| <i>Randomized clinical trials (n=112)</i> |             |                  |          |                |                                                                    |                     |          |                               |
| Choi, 2012                                | 120         | Adults           | 100      | I or II        | Orthopaedic                                                        | YES                 | YES      | NR                            |
| Wang, 2012                                | 130         | Adults           | 100      | I or II        | Miscellaneous                                                      | YES                 | YES      | NR                            |
| Ekinci, 2011                              | 100         | Adults           | 100      | I or II or III | Obstetrics & Gynaecological                                        | NR                  | NR       | NR                            |
| El-deeb, 2011b                            | 160         | Adults           | 100      | I or II        | Obstetrics & Gynaecological                                        | NR                  | NR       | NR                            |
| Gan, 2011                                 | 619         | Adults           | 100      | I or II or III | Miscellaneous                                                      | YES                 | YES      | NR                            |
| Gupta, 2011                               | 136         | Adults           | 62       | I or II        | Miscellaneous                                                      | NR                  | NR       | NR                            |
| Park, 2011                                | 90          | Adults           | 100      | I or II        | Obstetrics & Gynaecological                                        | YES                 | YES      | NR                            |
| Ryu, 2011                                 | 124         | Adults           | 54       | I or II        | Gastrointestinal                                                   | NR                  | NR       | Cardiovascular, liver disease |
| Sahoo, 2011                               | 52          | Adults           | 100      | I              | Obstetrics & Gynaecological                                        | NR                  | NR       | NR                            |
| Bilgin, 2010                              | 160         | Adults           | 100      | I or II        | Obstetrics & Gynaecological                                        | NR                  | NR       | NR                            |
| Choi, 2010                                | 279         | Adults & Elderly | 39       | NR             | Cardiovascular                                                     | YES                 | YES      | NR                            |
| Jee, 2010                                 | 100         | Adults           | 100      | I or II        | Obstetrics & Gynaecological                                        | YES                 | YES      | NR                            |
| Jokela, 2010                              | 80          | Adults           | 100      | I or II or III | Obstetrics & Gynaecological                                        | YES                 | YES      | NR                            |
| Mehta, 2010                               | 80          | Children         | 50       | I or II        | Miscellaneous                                                      | NR                  | NR       | NR                            |
| Shakya, 2010                              | 80          | Adults           | 63       | I or II        | Miscellaneous                                                      | NR                  | NR       | NR                            |
| Singla, 2010                              | 702         | Adults           | 100      | NR             | Miscellaneous                                                      | YES                 | YES      | NR                            |
| Feng, 2009                                | 192         | Adults           | 74       | I or II        | Gastrointestinal                                                   | YES                 | YES      | NR                            |
| Jain, 2009                                | 87          | Adults           | 29.9     | I or II        | Neurological                                                       | NR                  | NR       | NR                            |
| Riad, 2009                                | 100         | Children         | 48       | I or II        | Eye                                                                | NR                  | NR       | NR                            |
| Rosow, 2009                               | 244         | Adults & Elderly | 66       | I or II or III | Miscellaneous                                                      | NR                  | NR       | NR                            |
| Candiotti, 2008                           | 546         | Adults & Elderly | 95       | I or II or III | Miscellaneous                                                      | YES                 | YES      | NR                            |
| Choi, 2008                                | 94          | Adults           | 100      | NR             | Orthopaedic                                                        | YES                 | YES      | NR                            |
| Contreras-Dominguez, 2008                 | 150         | Adults           | 49       | I or II        | Gastrointestinal                                                   | NR                  | YES      | NR                            |
| Kovac, 2008                               | 544         | Adults           | 100      | I or II or III | Miscellaneous                                                      | YES                 | YES      | NR                            |
| Owczuk, 2008                              | 71          | Adults           | 11       | I or II        | Miscellaneous                                                      | NR                  | NR       | NR                            |
| Piper, 2008                               | 83          | Adults           | 56       | I or II        | General dentistry, oral and maxillofacial surgery and orthodontics | YES                 | YES      | NR                            |
| Said-Ahmed, 2008                          | 50          | Adults           | 100      | I or II        | Obstetrics & Gynaecological                                        | NR                  | NR       | NR                            |
| Bestas, 2007                              | 90          | Adults           | 77       | I or II        | Gastrointestinal                                                   | NR                  | NR       | NR                            |
| Diemunsch, 2007                           | 892         | Adults & Elderly | 91       | I or II or III | Miscellaneous                                                      | YES                 | YES      | NR                            |
| Gan, 2007                                 | 766         | Adults & Elderly | 94       | I or II or III | Miscellaneous                                                      | YES                 | YES      | NR                            |
| Han, 2007                                 | 80          | Adults           | 100      | I              | Obstetrics & Gynaecological                                        | NR                  | NR       | NR                            |
| Lee, 2007                                 | 86          | Adults           | 100      | I or II        | Obstetrics & Gynaecological                                        | YES                 | YES      | NR                            |
| Oksuz, 2007                               | 75          | Adults & Elderly | 65       | I or II        | Gastrointestinal                                                   | NR                  | YES      | NR                            |
| Rusch, 2007                               | 228         | Adults & Elderly | 49       | I or II or III | Miscellaneous                                                      | NR                  | YES      | NR                            |
| Sagir, 2007                               | 80          | Adults           | 0.7      | I or II        | Urological                                                         | NR                  | NR       | NR                            |
| Sandhu, 2007                              | 80          | Adults           | 71       | I or II        | Gastrointestinal                                                   | NR                  | NR       | NR                            |
| Siddik-Sayyid, 2007                       | 129         | Adults           | 100      | I or II        | Obstetrics &                                                       | NR                  | NR       | Obesity                       |

|                                   |      |                      |     |                   |                                                                          |     |     |          |
|-----------------------------------|------|----------------------|-----|-------------------|--------------------------------------------------------------------------|-----|-----|----------|
|                                   |      |                      |     |                   | Gynaecological                                                           |     |     |          |
| Bridge, 2006                      | 194  | Adults               | 100 | NR                | Miscellaneous                                                            | NR  | NR  | NR       |
|                                   |      |                      |     |                   | Obstetrics &                                                             |     |     |          |
| Chan, 2006                        | 394  | Adults               | 100 | I or II           | Gynaecological                                                           | YES | YES | NR       |
| Kelsaka, 2006                     | 50   | Adults               | 25  | I or II           | Orthopaedic                                                              | NR  | NR  | NR       |
|                                   |      |                      |     |                   | Obstetrics &                                                             |     |     |          |
| Sarvela, 2006                     | 87   | Adults               | 100 | NR                | Gynaecological                                                           | NR  | NR  | NR       |
| Tosun, 2006                       | 125  | Children             | 49  | I or II           | Eye                                                                      | NR  | NR  | NR       |
|                                   |      |                      |     |                   | Obstetrics &                                                             |     |     |          |
| D'Angelo, 2005                    | 121  | Adults               | 100 | I or II<br>or III | Gynaecological                                                           | YES | YES | NR       |
|                                   |      |                      |     |                   | Obstetrics &                                                             |     |     |          |
| Gan, 2005                         | 176  | Adults               | 100 | I or II<br>or III | Gynaecological                                                           | YES | YES | NR       |
|                                   |      |                      |     |                   | Obstetrics &                                                             |     |     |          |
| Khalil, 2005                      | 670  | Children             | 24  | I or II<br>or III | Miscellaneous                                                            | YES | YES | NR       |
|                                   |      |                      |     |                   | Obstetrics &                                                             |     |     |          |
| Kocamanoglu, 2005                 | 150  | Adults               | 100 | I or II           | Gynaecological                                                           | YES | YES | NR       |
|                                   |      |                      |     |                   | Obstetrics &                                                             |     |     |          |
| Kontrimaviciute, 2005             | 34   | Adults               | 100 | I or II           | Gynaecological                                                           | NR  | YES | NR       |
| Pirat, 2005                       | 150  | Adults               | 0   | I                 | Miscellaneous                                                            | NR  | NR  | NR       |
| Treschan, 2005                    | 142  | All groups           | 56  | I or II           | Eye                                                                      | YES | YES | NR       |
|                                   |      |                      |     |                   | Obstetrics &                                                             |     |     |          |
| White, 2005 <sup>†</sup>          | 372  | NR                   | 100 | NR                | Gynaecological                                                           | NR  | NR  | NR       |
| Apfel, 2004 (CR:<br>Jokela, 2009) | 260  | Adults               | 81  | NR                | Miscellaneous                                                            | YES | YES | NR       |
| Binstock, 2004                    | 101  | Children             | 42  | I or II           | Miscellaneous                                                            | NR  | NR  | NR       |
|                                   |      |                      |     |                   | Obstetrics &                                                             |     |     |          |
| Eberhart, 2004                    | 304  | Adults &<br>Elderly  | 52  | I or II<br>or III | Eye                                                                      | YES | YES | NR       |
|                                   |      |                      |     |                   | Obstetrics &                                                             |     |     |          |
| Hanaoka, 2004                     | 315  | Adults               | 95  | I or II<br>or III | Miscellaneous                                                            | YES | NR  | NR       |
| Samakarndi, 2004                  | 80   | Children             | 49  | I or II           | Eye                                                                      | NR  | NR  | NR       |
|                                   |      |                      |     |                   | Obstetrics &                                                             |     |     |          |
| Charuluxananan, 2003              | 180  | Adults               | 100 | I or II           | Gynaecological                                                           | NR  | NR  | NR       |
| Loewen, 2003                      | 71   | Adults               | 100 | NR                | Breast                                                                   | YES | YES | NR       |
| O'Brien, 2003                     | 150  | Children             | NR  | I or II           | Miscellaneous                                                            | YES | YES | NR       |
| Argiriadou, 2002                  | 87   | Adults               | 76  | I or II           | Gastrointestinal                                                         | NR  | NR  | NR       |
| Gurkan, 2002                      | 150  | Adults               | 53  | I or II           | Miscellaneous                                                            | NR  | NR  | NR       |
| Dabbous, 2001                     | 173  | Adults               | 77  | I or II           | Gastrointestinal                                                         | YES | YES | Diabetes |
|                                   |      |                      |     |                   | Obstetrics &                                                             |     |     |          |
| Kathirvel, 2001                   | 152  | Adults &<br>Children | 38  | I or II           | Neurological                                                             | NR  | NR  | NR       |
| Subramaniam, 2001                 | 135  | Children             | 54  | I or II           | Eye                                                                      | NR  | YES | NR       |
|                                   |      |                      |     |                   | Obstetrics &                                                             |     |     |          |
| Ahmed, 2000                       | 139  | Adults               | 100 | NR                | Gynaecological                                                           | YES | YES | NR       |
|                                   |      |                      |     |                   | Obstetrics &                                                             |     |     |          |
| Charuluxananan, 2000              | 80   | Adults               | 100 | I or II           | Gynaecological                                                           | NR  | NR  | NR       |
|                                   |      |                      |     |                   | General dentistry, oral<br>and maxillofacial<br>surgery and orthodontics |     |     |          |
| Jensen, 2000                      | 71   | Children             | 41  | I or II           |                                                                          | YES | NR  | NR       |
| Kreisler, 2000                    | 31   | Adults               | 81  | NR                | Miscellaneous                                                            | NR  | YES | NR       |
|                                   |      |                      |     |                   | Obstetrics &                                                             |     |     |          |
| Philip, 2000                      | 1030 | Adults               | 70  | I or II<br>or III | Miscellaneous                                                            | YES | YES | NR       |
| Zarate, 2000                      | 200  | Adults               | 44  | I or II           | Miscellaneous                                                            | YES | YES | NR       |
|                                   |      |                      |     |                   | Obstetrics &                                                             |     |     |          |
| Koivuranta, 1999                  | 428  | Adults               | 82  | I or II<br>or III | Miscellaneous                                                            | YES | YES | NR       |
| McCall, 1999                      | 73   | Children             | 53  | I or II           | Eye                                                                      | NR  | NR  | NR       |
|                                   |      |                      |     |                   | Obstetrics &                                                             |     |     |          |
| Sinha, 1999                       | 40   | Adults               | 47  | I or II<br>or III | Neurological                                                             | NR  | YES | NR       |
|                                   |      |                      |     |                   | Obstetrics &                                                             |     |     |          |
| Tsui, 1999                        | 121  | Adults               | 100 | I or II<br>or III | Gynaecological                                                           | NR  | NR  | NR       |
|                                   |      |                      |     |                   | Obstetrics &                                                             |     |     |          |
| Diemunsch, 1998                   | 793  | Adults               | 100 | I or II<br>or III | Gynaecological                                                           | YES | YES | NR       |
| Goodarzi, 1998                    | 81   | Children             | 43  | I or II           | Orthopaedic                                                              | NR  | NR  | NR       |
|                                   |      |                      |     |                   | General dentistry, oral<br>and maxillofacial<br>surgery and orthodontics |     |     |          |
| Hamid, 1998                       | 71   | Children             | 55  | I or II           |                                                                          | NR  | YES | NR       |
|                                   |      |                      |     |                   | Obstetrics &                                                             |     |     |          |
| Morris, 1998                      | 1044 | Adults               | 100 | I or II<br>or III | Gynaecological                                                           | NR  | YES | NR       |
| Scholz, 1998                      | 842  | Adults &             | 74  | I or II           | Miscellaneous                                                            | YES | YES | NR       |

|                                                    |     |                  |     |                |                                                                    |     |     |                            |
|----------------------------------------------------|-----|------------------|-----|----------------|--------------------------------------------------------------------|-----|-----|----------------------------|
|                                                    |     | Elderly          |     | or III         |                                                                    |     |     |                            |
| Tramer, 1998                                       | 157 | Children         | 49  | NR             | Eye                                                                | YES | YES |                            |
| Diemunsch, 1997b                                   | 281 | Adults           | 100 | I or II        | Obstetrics & Gynaecological                                        | NR  | YES | NR                         |
| Diemunsch, 1997c                                   | 337 | Adults           | 95  | I or II        | Obstetrics & Gynaecological                                        | NR  | YES | NR                         |
| Graczyk, 1997                                      | 635 | Adults           | 100 | I or II        | Obstetrics & Gynaecological                                        | NR  | YES | NR                         |
| Klockgether-Radke, 1997                            | 120 | Children         | 48  | I or II        | Eye                                                                | NR  | NR  | NR                         |
| Koivuranta, 1997                                   | 439 | Adults & Elderly | 100 | I or II or III | Miscellaneous                                                      | YES | YES | Migraines                  |
| Korttila, 1997                                     | 517 | Adults           | 94  | I or II or III | Miscellaneous                                                      | YES | YES | NR                         |
| Kovac, 1997                                        | 620 | Adults           | 83  | I or II or III | Miscellaneous                                                      | YES | YES | NR                         |
| Mikawa, 1997                                       | 200 | Adults & Elderly | 100 | I              | Obstetrics & Gynaecological                                        | NR  | YES | NR                         |
| Monagle, 1997                                      | 91  | Adults           | 100 | NR             | Obstetrics & Gynaecological                                        | NR  | YES | NR                         |
| Morton, 1997                                       | 427 | Children         | 51  | I or II        | General dentistry, oral and maxillofacial surgery and orthodontics | NR  | YES | NR                         |
| Patel, 1997                                        | 429 | Children         | 37  | I or II or III | Miscellaneous                                                      | YES | YES | NR                         |
| Purhonen, 1997                                     | 146 | Adults           | 100 | I or II or III | Miscellaneous                                                      | YES | YES | NR                         |
| Rung, 1997                                         | 121 | Adults & Elderly | 69  | I or II or III | Miscellaneous                                                      | YES | YES | NR                         |
| Scuderi, 1997                                      | 160 | Children         | 52  | I or II        | Eye                                                                | NR  | YES | NR                         |
| Taylor, 1997                                       | 523 | Adults & Elderly | 89  | I or II or III | Multiple types included                                            | YES | YES | NR                         |
| Ulusoy, 1997                                       | 40  | Adults           | 37  | I or II        | Miscellaneous                                                      | NR  | NR  | NR                         |
| Warriner, 1997                                     | 374 | Adults & Elderly | 100 | I or II        | Obstetrics & Gynaecological                                        | YES | YES | NR                         |
| Ali-melkkila, 1996                                 | 120 | Adults           | 42  | I or II or III | Eye                                                                | NR  | YES | NR                         |
| Capouet, 1996                                      | 385 | Adults           | 100 | I or II        | Miscellaneous                                                      | YES | YES | NR                         |
| Kovac, 1996 (CR: Pearman, 1994c)                   | 30  | Adults           | 100 | I or II        | Obstetrics & Gynaecological                                        | NR  | NR  | NR                         |
| Naguib, 1996                                       | 48  | Adults           | 100 | I or II        | Obstetrics & Gynaecological                                        | NR  | NR  | NR                         |
| Rose, 1996a                                        | 136 | Children         | 44  | I or II        | General dentistry, oral and maxillofacial surgery and orthodontics | NR  | NR  | NR                         |
| Desilva, 1995                                      | 50  | Adults           | 70  | I or II        | Gastrointestinal                                                   | NR  | NR  | NR                         |
| Litman, 1995                                       | 57  | Children         | 40  | I or II        | Eye                                                                | YES | YES | NR                         |
| Paech, 1995                                        | 259 | Adults           | 100 | NR             | Obstetrics & Gynaecological                                        | NR  | YES | NR                         |
| Paxton, 1995a                                      | 60  | Children         | 47  | NR             | Ear, nose and larynx                                               | NR  | NR  | NR                         |
| Kaufmann, 1994                                     | 286 | Adults           | 54  | I or II        | Orthopaedic                                                        | NR  | NR  | NR                         |
| Ummerhofer, 1994                                   | 200 | Children         | 34  | I or II        | Miscellaneous                                                      | NR  | NR  | NR                         |
| Dupeyron, 1993                                     | 243 | Adults & Elderly | 100 | I or II or III | Obstetrics & Gynaecological                                        | NR  | NR  | Cardiovascular, urological |
| Helmers, 1993                                      | 923 | Adults           | 100 | I or II or III | Obstetrics & Gynaecological                                        | NR  | NR  | NR                         |
| Raphael, 1993                                      | 123 | Adults           | 100 | NR             | Obstetrics & Gynaecological                                        | YES | YES | NR                         |
| Du Pen, 1992 (CR: Scuderi, 1993)                   | 500 | All groups       | 11  | I or II        | Miscellaneous                                                      | NR  | NR  | NR                         |
| Kovac, 1992 (CRs: McKenzie, 1993a; Pearman, 1994a) | 580 | Adults           | 100 | I or II        | Obstetrics & Gynaecological                                        | NR  | YES | NR                         |
| <i>Non-randomized clinical trials (n=2)</i>        |     |                  |     |                |                                                                    |     |     |                            |
| Charbit, 2005                                      | 85  | Adults           | 60  | NR             | Miscellaneous                                                      | NR  | NR  | NR                         |

|              |    |          |    |         |                   |    |    |    |
|--------------|----|----------|----|---------|-------------------|----|----|----|
| Lerman, 1996 | 28 | Children | 32 | I or II | Otolaryngological | NR | NR | NR |
|--------------|----|----------|----|---------|-------------------|----|----|----|

*Controlled before-after studies (n=1)*

|              |    |          |    |         |     |    |    |    |
|--------------|----|----------|----|---------|-----|----|----|----|
| Wagner, 2007 | 66 | Children | 54 | I or II | Eye | NR | NR | NR |
|--------------|----|----------|----|---------|-----|----|----|----|

**Note:** †Unpublished data (White, 2005).

**Abbreviations:** ASA, American Society of Anaesthesiologists physical classification system; NR, not reported or No; CR, companion report; PONV, post-operative nausea and vomiting; H/o, History of.

## Appendix 5. Cochrane EPOC Risk-of-bias appraisal results

| Author, year                              | 1       | 2       | 3       | 4       | 5       | 6       | 7       | 8       | 9       |
|-------------------------------------------|---------|---------|---------|---------|---------|---------|---------|---------|---------|
| <i>Randomized clinical trials (n=112)</i> |         |         |         |         |         |         |         |         |         |
| Choi, 2012                                | Low     | Low     | Unclear | Low     | Unclear | Low     | Low     | Unclear | Unclear |
| Wang, 2012                                | Low     | High    | Unclear | Low     | Low     | Low     | Unclear | Unclear | Unclear |
| Ekinci, 2011                              | Low     | Unclear | Unclear | Low     | Low     | Low     | Low     | Unclear | Unclear |
| El-deeb, 2011b                            | Low     | Low     | Unclear | Low     | Unclear | Low     | Low     | Unclear | Unclear |
| Gan, 2011                                 | Low     | Low     | Unclear | Low     | High    | Low     | Unclear | Low     | Low     |
| Gupta, 2011                               | Low     | Unclear | Unclear | Unclear | Unclear | Unclear | Low     | Unclear | Unclear |
| Park, 2011                                | Low     | Unclear | Unclear | Low     | Low     | Low     | Low     | Unclear | Low     |
| Ryu, 2011                                 | Low     | Low     | Unclear | Low     | Low     | Low     | Low     | Low     | Low     |
| Sahoo, 2011                               | Low     | Unclear | Unclear | Low     | Unclear | Low     | Low     | Unclear | Unclear |
| Bilgin, 2010                              | Low     | Low     | Unclear | Low     | Low     | Low     | Low     | Unclear | Unclear |
| Choi, 2010                                | Low     | Low     | Low     | Low     | High    | Unclear | Low     | Unclear | Unclear |
| Jee, 2010                                 | Low     | Unclear | Unclear | Low     | Unclear | Unclear | Unclear | Unclear | Unclear |
| Jokela, 2010                              | Low     | Unclear | Unclear | Low     | High    | Low     | Low     | Unclear | Unclear |
| Mehta, 2010                               | Low     | Low     | Low     | Low     | High    | Low     | Low     | Unclear | Unclear |
| Shakya, 2010                              | Unclear | Unclear | Unclear | Low     | Unclear | Unclear | Unclear | Unclear | Low     |
| Singla, 2010                              | Unclear | Unclear | Unclear | Low     | Low     | Low     | Unclear | Low     | Unclear |
| Feng, 2009                                | Low     | Low     | Low     | Low     | Low     | Low     | Low     | Unclear | Low     |
| Jain, 2009                                | Low     | Unclear | Unclear | Low     | High    | Unclear | Unclear | Unclear | Unclear |
| Riad, 2009                                | Unclear | Low     | Unclear | Low     | Low     | Low     | Low     | Unclear | Low     |
| Rosow, 2009                               | Unclear | High    | Unclear | Low     | Low     | Low     | Unclear | Unclear | High    |
| Candiotti, 2008                           | Low     | Low     | Low     | Low     | Low     | Unclear | Low     | Unclear | Unclear |
| Choi, 2008                                | Low     | Low     | Unclear | Low     | Unclear | Low     | Low     | Unclear | Unclear |
| Contreras-Dominguez, 2008                 | Unclear | Unclear | Unclear | Low     | Unclear | Low     | Low     | Unclear | Unclear |
| Kovac, 2008                               | Low     | Unclear | Unclear | Low     | Unclear | Unclear | Low     | Unclear | Unclear |
| Owczuk, 2008                              | Low     | Unclear | Unclear | Low     | Low     | Unclear | Low     | Unclear | Unclear |
| Piper, 2008                               | Unclear | Low     | Unclear | Low     | Unclear | Low     | Low     | Low     | Low     |
| Said-Ahmed, 2008                          | Unclear | Low     | Unclear | Low     | Unclear | Low     | Low     | Unclear | Unclear |
| Bestas, 2007                              | Unclear | Unclear | Unclear | Low     | Low     | Low     | Low     | Unclear | Unclear |
| Diemunsch, 2007                           | Low     | Low     | Unclear | Low     | Unclear | Low     | Unclear | Low     | High    |
| Gan, 2007                                 | Low     | Low     | Unclear | Low     | Low     | Low     | Low     | Unclear | Unclear |
| Han, 2007                                 | Unclear | Unclear | Unclear | Low     | Low     | Low     | Unclear | Unclear | Unclear |
| Lee, 2007                                 | Low     | Low     | Low     | Low     | Low     | Low     | Low     | Unclear | Low     |
| Oksuz, 2007                               | Unclear | Unclear | Unclear | Low     | Low     | Low     | Low     | Unclear | Low     |
| Rusch, 2007                               | Low     | Unclear | Low     | Low     | Unclear | Low     | Unclear | Unclear | Low     |
| Sagir, 2007                               | Low     | Low     | Unclear | Low     | Unclear | Low     | Low     | Unclear | Unclear |
| Sandhu, 2007                              | Unclear | Low     | Unclear | Low     | Low     | Low     | Low     | Unclear | Unclear |
| Siddik-Sayyid, 2007                       | Low     | Low     | Unclear | Low     | Low     | Low     | Low     | Unclear | Low     |
| Bridge, 2006                              | Unclear | Low     | Unclear | Low     | Unclear | Unclear | Low     | Unclear | Unclear |
| Chan, 2006                                | Low     | Low     | Low     | Low     | Low     | Low     | Low     | Unclear | Low     |
| Kelsaka, 2006                             | Unclear | Unclear | Unclear | Low     | Unclear | Low     | Low     | Unclear | Unclear |
| Sarvela, 2006                             | Unclear | Low     | Low     | Low     | High    | Low     | Low     | Unclear | Unclear |
| Tosun, 2006                               | Unclear | Unclear | Unclear | Low     | Unclear | Unclear | Unclear | Unclear | Unclear |
| D'Angelo, 2005                            | Low     | Low     | Unclear | High    | Low     | Low     | Low     | Unclear | Unclear |
| Gan, 2005                                 | Low     | Low     | Unclear | Low     | Low     | Low     | Low     | Unclear | Unclear |
| Khalil, 2005                              | Unclear | High    | Low     | Low     | High    | Unclear | Unclear | Unclear | High    |
| Kocamanoglu, 2005                         | Unclear | Unclear | Low     | Low     | Unclear | Low     | Low     | Unclear | Unclear |
| Kontrimaviciute, 2005                     | Unclear | Unclear | Unclear | Low     | Unclear | Unclear | Unclear | Unclear | Unclear |
| Pirat, 2005                               | Unclear | Unclear | Unclear | Low     | Unclear | Low     | Low     | Unclear | Unclear |
| Treschan, 2005                            | Low     | Low     | Unclear | Low     | Unclear | Low     | Low     | Unclear | Unclear |
| White, 2005 <sup>†</sup>                  | Unclear | Unclear | Unclear | Low     | Unclear | Unclear | Unclear | Unclear | Unclear |
| Apfel, 2004 (CR: Jokela, 2009)            | Low     | Low     | Unclear | Unclear | Low     | Low     | Low     | Unclear | Low     |
| Binstock, 2004                            | Unclear | Unclear | Unclear | High    | Low     | Unclear | Low     | Unclear | Unclear |
| Eberhart, 2004                            | Unclear | Low     | Unclear | Low     | Low     | Low     | Low     | Unclear | Unclear |
| Hanaoka, 2004                             | Unclear | Low     | Unclear | Low     | High    | Unclear | Unclear | Unclear | Unclear |
| Samakarndi, 2004                          | Unclear | Unclear | Low     | Unclear | Low     | Low     | Low     | Unclear | Unclear |
| Charuluxananan, 2003                      | Low     | Low     | Unclear | Low     | Low     | Low     | Low     | Unclear | Unclear |

|                                                    |         |         |         |         |         |         |         |         |         |
|----------------------------------------------------|---------|---------|---------|---------|---------|---------|---------|---------|---------|
| Loewen, 2003                                       | Low     | Low     | Unclear | Low     | Low     | Low     | Low     | Unclear | Unclear |
| O'Brien, 2003                                      | Unclear | Unclear | Unclear | Unclear | Low     | Unclear | Low     | Unclear | Unclear |
| Argiriadou, 2002                                   | Low     | Low     | Unclear | Low     | Unclear | Low     | Low     | Unclear | Unclear |
| Gurkan, 2002                                       | Low     | Unclear | Unclear | Low     | Unclear | Low     | Low     | Unclear | Unclear |
| Dabbous, 2001                                      | Low     | Low     | Unclear | Low     | High    | Low     | Low     | Unclear | Unclear |
| Kathirvel, 2001                                    | Low     | Unclear | Unclear | Low     | Unclear | Low     | Low     | Unclear | Unclear |
| Subramaniam, 2001                                  | Low     | Low     | Unclear | Low     | Low     | Low     | Low     | Unclear | Unclear |
| Ahmed, 2000                                        | Low     | Unclear | Unclear | Low     | Low     | Low     | Low     | Unclear | Unclear |
| Charuluxananan, 2000                               | Low     | Low     | Unclear | Low     | Unclear | Unclear | Low     | Unclear | Unclear |
| Jensen, 2000                                       | Low     | Unclear | Unclear | Unclear | Low     | Low     | Low     | Unclear | Low     |
| Kreislser, 2000                                    | Unclear | Unclear | Unclear | Low     | High    | Low     | Low     | Unclear | High    |
| Philip, 2000                                       | Unclear | Unclear | Unclear | Low     | Low     | Unclear | Low     | Unclear | Low     |
| Zarate, 2000                                       | Low     | Unclear | Unclear | Low     | Low     | Low     | Unclear | Unclear | Unclear |
| Koivuranta, 1999                                   | Unclear | Low     | Unclear | Low     | Low     | Low     | Low     | Unclear | Unclear |
| McCall, 1999                                       | Unclear | Unclear | Unclear | Low     | Unclear | Low     | Low     | Unclear | Unclear |
| Sinha, 1999                                        | Low     | Unclear | Unclear | Low     | High    | Low     | Low     | Unclear | Unclear |
| Tsui, 1999                                         | Unclear | Unclear | Unclear | Low     | Unclear | Low     | Unclear | Unclear | Low     |
| Diemunsch, 1998                                    | Unclear | Unclear | Unclear | Low     | Low     | Unclear | Low     | Unclear | Unclear |
| Goodarzi, 1998                                     | Unclear | Unclear | Unclear | Low     | Low     | Low     | Low     | Unclear | Unclear |
| Hamid, 1998                                        | Low     | Low     | Unclear | Low     | Low     | Low     | Low     | Unclear | Unclear |
| Morris, 1998                                       | Unclear | Unclear | Unclear | Low     | Unclear | Unclear | Unclear | Unclear | Unclear |
| Scholz, 1998                                       | Unclear | Low     | Unclear | Low     | Low     | Unclear | Unclear | Unclear | Unclear |
| Tramer, 1998                                       | Low     | Unclear | Unclear | Low     | Unclear | Low     | Low     | Unclear | Unclear |
| Diemunsch, 1997b                                   | Unclear | Low     | Low     | Low     | Unclear | Unclear | Low     | Unclear | Unclear |
| Diemunsch, 1997c                                   | Unclear | Unclear | Low     | Low     | Unclear | Unclear | Low     | Unclear | Unclear |
| Graczyk, 1997                                      | Unclear | Low     | Unclear | Low     | Low     | Low     | Low     | Unclear | Unclear |
| Klockgether-Radke, 1997                            | Unclear | Unclear | Unclear | Low     | Unclear | Unclear | Low     | Unclear | Unclear |
| Koivuranta, 1997                                   | Low     | Unclear | Unclear | High    | Low     | Low     | Low     | Unclear | Unclear |
| Korttila, 1997                                     | Unclear | Unclear | Unclear | Low     | Low     | Unclear | Unclear | Unclear | Unclear |
| Kovac, 1997                                        | Low     | Low     | Low     | High    | Low     | Unclear | Low     | Unclear | Unclear |
| Mikawa, 1997                                       | Unclear | Unclear | Low     | Low     | Unclear | Low     | Low     | Unclear | Unclear |
| Monagle, 1997                                      | Unclear | Low     | Low     | Low     | Low     | Low     | Unclear | Unclear | Unclear |
| Morton, 1997                                       | Unclear | Unclear | Unclear | Low     | Low     | Unclear | Low     | Unclear | Unclear |
| Patel, 1997                                        | Unclear | Unclear | Unclear | Low     | Low     | Low     | Low     | Unclear | Unclear |
| Purhonen, 1997                                     | Unclear | Low     | Low     | Low     | Low     | Low     | Unclear | Unclear | Unclear |
| Rung, 1997                                         | Low     | Low     | Low     | Low     | Unclear | Unclear | Low     | Unclear | Unclear |
| Scuderi, 1997                                      | Low     | Unclear | Unclear | Low     | Unclear | Unclear | Low     | Unclear | Unclear |
| Taylor, 1997                                       | Low     | Unclear | Low     | Low     | High    | Unclear | Unclear | Unclear | Unclear |
| Ulusoy, 1997                                       | Unclear | Unclear | Unclear | Unclear | Unclear | Unclear | Low     | Unclear | Unclear |
| Warriner, 1997                                     | Unclear | Unclear | Unclear | Low     | Low     | Unclear | Low     | Unclear | Unclear |
| Ali-melkkila, 1996                                 | Unclear | Unclear | Unclear | Low     | Low     | Unclear | Low     | Unclear | Unclear |
| Capouet, 1996                                      | Unclear | Low     | Unclear | Low     | Unclear | Unclear | Low     | Unclear | Unclear |
| Kovac, 1996 (CR: Pearman, 1994c)                   | Unclear | Unclear | Unclear | Low     | Unclear | Unclear | Low     | Unclear | Unclear |
| Naguib, 1996                                       | Unclear | Low     | Unclear | Low     | Unclear | Low     | Low     | Unclear | Unclear |
| Rose, 1996a                                        | Unclear | Low     | Unclear | Low     | Low     | Low     | Low     | Unclear | Unclear |
| Desilva, 1995                                      | Unclear | Low     | Low     | Low     | High    | Low     | Low     | Unclear | Unclear |
| Litman, 1995                                       | Low     | Unclear | Unclear | Low     | Unclear | Unclear | Unclear | Unclear | Unclear |
| Paech, 1995                                        | Low     | Unclear | Unclear | Low     | Low     | Unclear | Low     | Unclear | Unclear |
| Paxton, 1995a                                      | Unclear | Unclear | Unclear | Low     | Unclear | Unclear | Low     | Unclear | Low     |
| Kaufmann, 1994                                     | Low     | Low     | Unclear | High    | Low     | Low     | Low     | Unclear | Unclear |
| Ummerhofer, 1994                                   | Low     | Low     | Unclear | Low     | Unclear | Low     | Low     | Unclear | Unclear |
| Dupeyron, 1993                                     | Unclear | Unclear | Unclear | Low     | Unclear | Unclear | Low     | Unclear | Unclear |
| Helmers, 1993                                      | Unclear | Unclear | Unclear | Low     | Low     | Unclear | Unclear | Unclear | Unclear |
| Raphael, 1993                                      | Unclear | Unclear | Low     | Low     | Low     | Unclear | Unclear | Unclear | Unclear |
| Du Pen, 1992 (CR: Scuderi, 1993)                   | Unclear | Unclear | Low     | High    | Unclear | Unclear | Low     | Unclear | Unclear |
| Kovac, 1992 (CRs: McKenzie, 1993a; Pearman, 1994a) | Unclear | Unclear | Low     | Low     | Low     | Unclear | Low     | Unclear | Unclear |

*Non-randomized clinical trials (n=2)*

|               |      |      |         |     |         |      |     |         |         |
|---------------|------|------|---------|-----|---------|------|-----|---------|---------|
| Charbit, 2005 | High | High | Low     | Low | Unclear | Low  | Low | Unclear | Unclear |
| Lerman, 1996  | High | High | Unclear | Low | Unclear | High | Low | Unclear | Unclear |

---

*Controlled before-after studies (n=1)*

Wagner, 2007                      High              High              Unclear              High              High              High              Unclear              Unclear              High

---

**Note:** †Unpublished data.

**Abbreviations:** CR, companion report; EPOC, Effective Practice and Organization of Care; High, high risk; Low, low risk; Unclear, unclear risk .

**Items:**

1. Random sequence generation
  2. Allocation concealment
  3. Similar baseline outcome measures
  4. Similar baseline characteristics
  5. Incomplete outcome data
  6. Blinding of outcome assessor
  7. Contamination
  8. Selective outcome reporting
  9. Other bias
-

**Appendix 6. Aggregate EPOC risk-of-bias appraisal results**

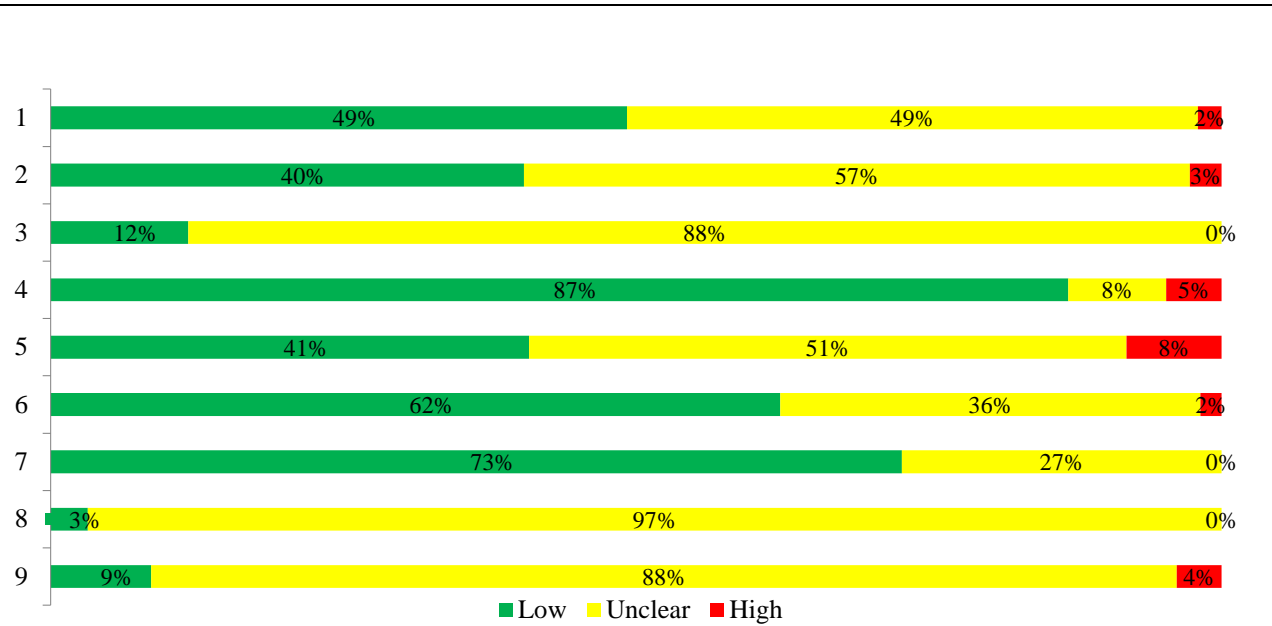

**Abbreviations:** EPOC, Effective Practice and Organization of Care; High, High risk of bias; Low, Low risk of bias; Unclear, Unclear risk of bias.

**Items:**

1. Random sequence generation
2. Allocation concealment
3. Similar baseline outcome measures
4. Similar baseline characteristics
5. Incomplete outcome data
6. Blinding
7. Contamination
8. Selective outcome reporting
9. Other bias



## Appendix 7. McHarm appraisal results

| Author, year                      | 1 | 2 | 3 | 4 | 5 | 6  | 7 | 8 | 9 | 10 | 11 | 12 | 13 | 14 | 15 |
|-----------------------------------|---|---|---|---|---|----|---|---|---|----|----|----|----|----|----|
| <i>Randomized clinical trials</i> |   |   |   |   |   |    |   |   |   |    |    |    |    |    |    |
| Wang, 2012                        | P | U | U | U | P | U  | U | U | P | C  | P  | C  | U  | C  | U  |
| Ekinci, 2011                      | P | U | U | U | P | U  | U | U | U | P  | C  | U  | U  | C  | C  |
| El-deeb, 2011b                    | P | U | U | U | P | U  | U | U | U | U  | U  | U  | U  | C  | P  |
| Sahoo, 2011                       | U | U | U | U | C | U  | U | U | C | P  | C  | U  | U  | C  | P  |
| Choi, 2010                        | P | U | U | U | P | U  | P | U | U | P  | P  | P  | U  | P  | U  |
| Jokela, 2010                      | P | U | U | U | C | U  | C | C | C | C  | C  | C  | C  | C  | C  |
| Mehta, 2010                       | P | U | U | U | C | U  | C | C | C | C  | U  | C  | U  | U  | U  |
| Shakya, 2010                      | P | U | U | U | U | U  | U | U | U | P  | P  | U  | U  | C  | U  |
| Feng, 2009                        | P | U | U | U | C | U  | U | U | C | P  | C  | C  | U  | C  | P  |
| Jain, 2009                        | P | U | U | U | C | U  | P | P | P | P  | C  | C  | U  | C  | U  |
| Riad, 2009                        | U | U | U | U | C | U  | P | U | C | P  | U  | U  | U  | C  | P  |
| Candiotti, 2008                   | U | U | U | U | U | U  | U | U | U | U  | C  | C  | P  | C  | U  |
| Contreras-Dominguez, 2008         | P | U | U | U | C | U  | C | C | C | P  | C  | U  | U  | C  | U  |
| Kovac, 2008                       | U | U | U | U | U | U  | U | U | U | U  | C  | U  | C  | C  | C  |
| Owczuk, 2008                      | P | U | U | U | C | U  | U | U | C | P  | U  | C  | U  | U  | P  |
| Piper, 2008                       | U | U | U | U | U | U  | U | U | U | U  | C  | U  | U  | C  | U  |
| Said-Ahmed, 2008                  | P | U | U | U | C | U  | C | P | C | P  | C  | U  | U  | U  | P  |
| Aouad, 2007                       | P | U | U | U | P | U  | C | P | C | C  | C  | C  | U  | C  | C  |
| Balki, 2007                       | P | U | U | U | C | U  | U | U | P | P  | C  | C  | U  | C  | C  |
| Diemunsch, 2007                   | P | U | U | U | C | U  | P | U | C | P  | C  | C  | C  | C  | C  |
| Gan, 2007                         | P | U | U | C | C | U  | P | U | C | C  | C  | C  | C  | C  | P  |
| Han, 2007                         | P | U | U | U | P | U  | C | C | P | C  | U  | C  | U  | C  | U  |
| Lee, 2007                         | P | U | U | U | P | U  | C | C | C | P  | P  | C  | U  | C  | U  |
| Rusch, 2007                       | U | U | U | U | C | U  | P | P | C | P  | C  | C  | C  | C  | P  |
| Sagir, 2007                       | C | U | U | U | P | U  | U | U | U | P  | C  | U  | U  | C  | C  |
| Siddik-Sayyid, 2007               | P | U | U | U | P | U  | C | C | C | P  | P  | U  | U  | P  | U  |
| Chan, 2006                        | P | U | U | U | C | U  | P | U | C | P  | C  | C  | U  | C  | P  |
| Kelsaka, 2006                     | U | U | U | U | U | U  | U | U | C | U  | U  | U  | U  | U  | U  |
| Sarvela, 2006                     | U | U | U | U | C | P  | U | U | C | P  | U  | C  | U  | U  | P  |
| Tosun, 2006                       | P | U | U | U | C | NA | C | C | C | U  | C  | U  | U  | C  | C  |
| Gan, 2005                         | P | U | U | C | P | U  | C | P | U | U  | C  | C  | C  | C  | P  |
| Khalil, 2005                      | P | U | U | U | C | NA | P | U | C | U  | C  | P  | P  | C  | C  |
| Kontrimaviciute, 2005             | U | U | U | U | P | U  | U | U | P | P  | C  | U  | U  | C  | U  |
| Pirat, 2005                       | C | U | U | U | P | U  | C | C | C | P  | C  | U  | U  | C  | U  |
| Treschan, 2005                    | U | U | U | U | C | U  | U | U | C | P  | C  | U  | U  | U  | P  |
| Binstock, 2004                    | P | U | U | U | C | U  | U | U | C | U  | C  | P  | U  | P  | C  |
| Eberhart, 2004                    | P | U | U | U | U | U  | U | U | U | U  | C  | C  | U  | C  | U  |
| Hanaoka, 2004                     | P | C | U | U | P | U  | C | U | P | P  | U  | C  | C  | C  | U  |
| Samakarndi, 2004                  | U | U | U | U | C | U  | U | U | C | P  | U  | U  | U  | U  | P  |
| Charuluxananan, 2003              | P | U | U | U | C | U  | P | U | C | P  | C  | C  | C  | C  | C  |
| Loewen, 2003                      | P | U | U | U | C | U  | C | C | U | C  | C  | C  | U  | C  | U  |
| O'Brien, 2003                     | P | U | U | U | P | U  | C | C | C | U  | P  | C  | C  | C  | U  |
| Gurkan, 2002                      | P | U | U | U | P | U  | U | U | C | P  | U  | U  | U  | C  | P  |
| Dabbous, 2001                     | P | U | U | U | U | U  | U | U | U | U  | C  | U  | U  | C  | U  |
| Kathirvel, 2001                   | P | U | U | U | P | U  | C | C | P | U  | C  | C  | C  | C  | U  |
| Subramaniam, 2001                 | U | U | U | U | C | U  | U | U | C | P  | C  | U  | U  | C  | P  |
| Ahmed, 2000                       | U | U | U | U | C | U  | C | U | C | U  | C  | C  | C  | U  | P  |
| Charuluxananan, 2000              | U | U | U | U | U | U  | P | U | P | U  | U  | U  | U  | U  | P  |
| Jensen, 2000                      | U | U | U | U | C | U  | U | U | C | P  | C  | C  | U  | C  | P  |
| Kreisler, 2000                    | P | U | U | U | P | U  | P | U | U | U  | C  | U  | U  | C  | U  |
| Philip, 2000                      | P | U | U | U | P | U  | U | U | U | C  | P  | C  | U  | U  | C  |
| Zarate, 2000                      | P | U | U | U | C | U  | C | C | C | U  | U  | U  | U  | U  | C  |
| Koivuranta, 1999                  | U | U | U | U | C | U  | C | C | C | U  | C  | C  | U  | C  | U  |
| McCall, 1999                      | P | U | U | U | P | U  | P | U | U | C  | C  | P  | C  | C  | U  |
| Sinha, 1999                       | U | U | U | P | P | U  | U | U | P | U  | C  | C  | U  | C  | U  |
| Diemunsch, 1998                   | P | U | U | U | C | U  | U | U | C | P  | C  | U  | U  | C  | C  |
| Hamid, 1998                       | U | U | U | U | U | U  | U | U | U | U  | U  | P  | U  | U  | U  |
| Tramer, 1998                      | C | U | U | U | C | NA | C | C | P | C  | C  | C  | U  | C  | C  |

|                                   |   |   |   |   |    |    |   |   |   |   |   |   |   |   |   |
|-----------------------------------|---|---|---|---|----|----|---|---|---|---|---|---|---|---|---|
| Diemunsch, 1997b                  | P | U | U | U | C  | U  | U | U | C | P | C | U | C | C | C |
| Diemunsch, 1997c                  | P | U | U | U | P  | U  | U | U | U | C | C | U | C | C | C |
| Graczyk, 1997                     | P | U | U | U | C  | U  | U | U | C | P | C | U | U | C | C |
| Klockgether-Radke, 1997           | C | U | U | U | P  | U  | U | U | P | P | C | U | U | C | C |
| Koivuranta, 1997                  | P | U | U | P | C  | U  | U | U | C | U | C | C | C | C | P |
| Korttila, 1997                    | P | U | U | U | C  | NA | U | U | C | P | C | C | C | C | P |
| Kovac, 1997                       | P | U | U | U | C  | P  | P | U | C | P | C | U | C | C | C |
| Mikawa, 1997                      | P | U | U | U | C  | NA | P | U | C | P | C | P | U | C | C |
| Monagle, 1997                     | U | U | U | U | P  | P  | P | P | P | P | U | P | U | U | C |
| Morton, 1997                      | U | U | U | U | U  | U  | U | U | C | U | C | C | U | C | C |
| Patel, 1997                       | P | U | U | U | C  | C  | C | P | C | U | C | C | U | C | U |
| Purhonen, 1997                    | C | U | U | U | P  | U  | U | U | P | P | U | C | U | C | P |
| Scuderi, 1997                     | P | U | U | U | C  | U  | U | U | C | P | P | U | U | C | P |
| Taylor, 1997                      | U | U | U | C | P  | P  | C | P | P | U | C | P | U | C | U |
| Ulusoy, 1997                      | P | U | U | U | P  | U  | U | U | C | U | C | U | U | C | P |
| Warriner, 1997                    | U | U | U | C | C  | U  | U | U | C | P | C | U | U | C | C |
| Capouet, 1996                     | U | U | U | U | P  | P  | C | P | C | U | C | P | U | C | U |
| Kovac, 1996 (CR: Pearman 1994)    | P | U | U | U | P  | P  | C | P | C | P | C | C | U | C | C |
| Scholz, 1996                      | U | U | U | U | U  | U  | U | U | C | P | C | U | U | C | P |
| Desilva, 1995                     | P | U | U | U | P  | U  | P | U | U | U | C | C | U | C | C |
| Litman, 1995                      | U | U | U | U | C  | U  | U | U | C | U | U | U | U | P | C |
| Paech, 1995                       | P | U | U | U | C  | NA | P | U | C | C | C | P | U | C | C |
| Paxton, 1995a                     | U | U | U | U | P  | U  | P | U | C | P | U | U | U | U | P |
| Kaufmann, 1994                    | P | U | U | U | P  | U  | C | C | C | P | C | C | U | C | C |
| Ummenhofer, 1994                  | U | U | U | U | C  | U  | P | U | C | P | U | U | U | C | P |
| Dupeyron, 1993                    | U | U | U | U | C  | C  | P | P | U | U | C | U | U | C | U |
| Helmers, 1993                     | P | U | U | C | C  | C  | P | U | C | P | C | P | U | C | U |
| Raphael, 1993                     | U | U | U | U | C  | C  | U | U | C | P | C | C | P | C | P |
| Du Pen, 1992                      | P | U | U | U | NA | C  | P | U | P | U | C | U | U | C | U |
| Kovac, 1992 (CR: Mckenzie, 1993a) | P | U | U | U | P  | U  | P | U | C | P | C | U | C | C | C |

*Non-randomized clinical trials*

|               |   |   |   |   |   |   |   |   |   |   |   |   |   |   |   |
|---------------|---|---|---|---|---|---|---|---|---|---|---|---|---|---|---|
| Charbit, 2005 | P | U | U | U | C | U | C | U | C | C | C | U | U | C | C |
|---------------|---|---|---|---|---|---|---|---|---|---|---|---|---|---|---|

*Controlled before-after studies*

|              |   |   |   |   |   |   |   |   |   |   |   |   |   |   |   |
|--------------|---|---|---|---|---|---|---|---|---|---|---|---|---|---|---|
| Wagner, 2007 | U | U | U | U | P | U | U | U | C | U | C | U | U | C | U |
|--------------|---|---|---|---|---|---|---|---|---|---|---|---|---|---|---|

**Abbreviations:** C, complete; NA, not applicable; P, partial; U, unclear.

**Items:**

1. Were the harms pre-defined using standard or precise definitions?
2. Were serious events precisely defined?
3. Were severe events precisely defined?
4. Were the number of deaths in each study group specified or were the reason(s) for unclear specifying given?
5. Was the mode of harms collection specified as active?
6. Was the mode of harms collection specified as passive?
7. Did the study specify who collected the harms?
8. Did the study specify the training or background of who ascertained the harms?
9. Did the study specify the timing and frequency of collection of the harms?
10. Did the authors use standard scales or checklists for harms collection?
11. Did the authors specify if the harms reported encompass all the events collected or a selected sample?
12. Was the overall number of participants that withdrew or were lost to follow-up, including each reason why, specified for each study group?
13. Was the number of participants who withdrew due to harms specified for each study group?
14. Did the author(s) specify the number and type of harmful events for each study group?
15. Did the author(s) specify the type of analyses undertaken for harms data?

## Appendix 8. Aggregate McHarm appraisal results

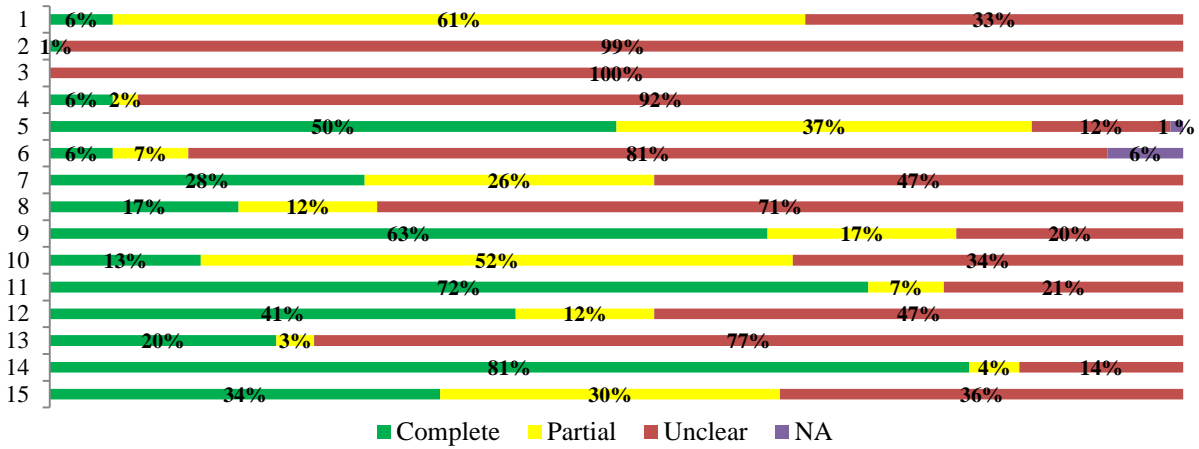

### Items:

1. Were the harms pre-defined using standard or precise definitions?
2. Were serious events precisely defined?
3. Were severe events precisely defined?
4. Were the number of deaths in each study group specified or were the reason(s) for unclear specifying given?
5. Was the mode of harms collection specified as active?
6. Was the mode of harms collection specified as passive?
7. Did the study specify who collected the harms?
8. Did the study specify the training or background of who ascertained the harms?
9. Did the study specify the timing and frequency of collection of the harms?
10. Did the authors use standard scales or checklists for harms collection?
11. Did the authors specify if the harms reported encompass all the events collected or a selected sample?
12. Was the overall number of participants that withdrew or were lost to follow-up, including each reason why, specified for each study group?
13. Was the number of participants who withdrew due to harms specified for each study group?
14. Did the author(s) specify the number and type of harmful events for each study group?
15. Did the author(s) specify the type of analyses undertaken for harms data?

**Appendix 9. Comparison adjusted funnel plots**

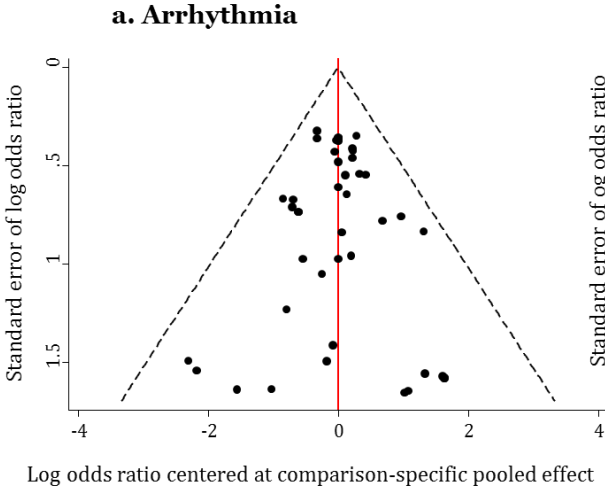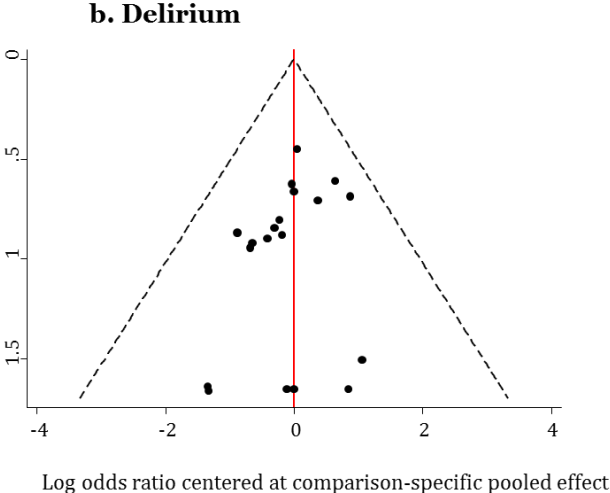

## Appendix 10. Definitions of arrhythmia

| Study                   | Definition of arrhythmia                                                                                                                                                                                                                                                     |
|-------------------------|------------------------------------------------------------------------------------------------------------------------------------------------------------------------------------------------------------------------------------------------------------------------------|
| Sahoo, 2012             | No definition for bradycardia reported                                                                                                                                                                                                                                       |
| El-Deeb, 2011b          | No definition for bradycardia reported                                                                                                                                                                                                                                       |
| Choi, 2010              | 'Episodes of arrhythmias (i.e., atrial fibrillation or flutter, paroxysmal supraventricular tachycardia, atrial or ventricular premature contraction, or ventricular tachycardia) observed via ECG during the ICU stay were also recorded'; No specific definitions provided |
| Ekinci, 2009            | No definition for tachycardia reported                                                                                                                                                                                                                                       |
| Raid, 2009              | No definition for OCR requiring atropine reported                                                                                                                                                                                                                            |
| Owczuk, 2008            | No definition for bradycardia requiring atropine reported                                                                                                                                                                                                                    |
| Kelsaka, 2006           | No definition for bradycardia reported                                                                                                                                                                                                                                       |
| Gan, 2005               | No definition for bradycardia reported                                                                                                                                                                                                                                       |
| Kahlil, 2005            | No definition for 'tachycardia & nodal arrhythmia' reported                                                                                                                                                                                                                  |
| Treschan, 2005          | No definition for OCR reported                                                                                                                                                                                                                                               |
| Binstock, 2004          | No definition for tachycardia reported                                                                                                                                                                                                                                       |
| Eberhart, 2004          | No definition for bradycardia (OCR) requiring atropine reported                                                                                                                                                                                                              |
| Hanaoka, 2004           | No definition for ventricular fibrillation (cardiac arrest) reported                                                                                                                                                                                                         |
| Samarkandi, 2004        | No definition for OCR requiring atropine reported                                                                                                                                                                                                                            |
| Philip, 2000            | No definition for 'sinus arrhythmia' reported                                                                                                                                                                                                                                |
| Subramaniam, 2000       | No definition for OCR requiring atropine reported                                                                                                                                                                                                                            |
| Tramer, 1998            | 'A significant OCR was defined as an acute decrease in heart rate of 20% or greater associated with traction on an eye muscle'                                                                                                                                               |
| Diemunsch, 1997b        | No definition for bradycardia reported                                                                                                                                                                                                                                       |
| Klockgether-Radke, 1997 | No definition for 'OCR' reported                                                                                                                                                                                                                                             |
| Korttila, 1997          | No definition for bradycardia reported                                                                                                                                                                                                                                       |
| Morton, 1997            | No definition for bradycardia reported                                                                                                                                                                                                                                       |
| Purhonen, 1997          | Bradycardia defined as 'heart rate <50 bpm'                                                                                                                                                                                                                                  |
| Capouet, 1996           | No definition for 'bradycardia treated with an anticholinergic' reported                                                                                                                                                                                                     |
| Hennes, 1996            | No definition for bradycardia reported                                                                                                                                                                                                                                       |
| Paxton, 1995a           | No definition of nodal rhythms reported                                                                                                                                                                                                                                      |
| Helmerts, 1993          | No definition for bradycardia reported                                                                                                                                                                                                                                       |

**Abbreviations:** Bpm, beats per minute; ECG, electrocardiogram; ICU, intensive care unit; OCR, oculocardiac reflex.

**Appendix 11. Network meta-analysis for all outcomes for all time periods**

| <i>Treatment Comparison</i>                               | <i># of studies</i> | <i>MA estimate: OR (95% CI)</i> | <i>NMA estimate: OR (95% CI)</i> | <i># of studies</i>                                      | <i>MA estimate: OR (95% CI)</i> | <i>NMA estimate: OR (95% CI)</i> |
|-----------------------------------------------------------|---------------------|---------------------------------|----------------------------------|----------------------------------------------------------|---------------------------------|----------------------------------|
| <b>Arrhythmia (all ages) - 31 RCTs and 6,623 patients</b> |                     |                                 |                                  | <b>Arrhythmia (children) - 9 RCTs and 1,572 patients</b> |                                 |                                  |
| Ondansetron vs Placebo                                    | 18                  | 0.93 (0.70–1.23)                | 0.92 (0.69–1.21)                 | 8                                                        | 1.12 (0.54–2.33)                | 1.09 (0.56–2.14)                 |
| Granisetron vs Placebo                                    | 2                   | 1.12 (0.40–3.11)                | 1.12 (0.40–3.11)                 | NA                                                       | NA                              | NA                               |
| Dolasetron vs Placebo                                     | 7                   | 0.67 (0.45–1.00)                | 0.68 (0.46–1.01)                 | NA                                                       | NA                              | NA                               |
| Tropisetron vs Placebo                                    | 4                   | 0.93 (0.48–1.79)                | 0.91 (0.49–1.68)                 | NA                                                       | NA                              | NA                               |
| Ondansetron+DEX vs Placebo                                | 2                   | 0.78 (0.19–3.14)                | 0.52 (0.16–1.68)                 | 2                                                        | 0.78 (0.19–3.14)                | 0.72 (0.20–2.66)                 |
| Ramosectron vs Placebo                                    | 1                   | 1.36 (0.66–2.80)                | 1.15 (0.61–2.15)                 | NA                                                       | NA                              | NA                               |
| Granisetron+DEX vs Placebo                                | 2                   | 2.63 (0.75–9.29)                | 2.96 (1.11–7.94)                 | 1                                                        | 4.89 (1.15–20.79)               | 5.15 (1.33–19.91)                |
| Dolasetron+DROP vs Placebo                                | 1                   | 0.91 (0.45–1.84)                | 0.91 (0.48–1.73)                 | NA                                                       | NA                              | NA                               |
| Granisetron vs Ondansetron                                | NA                  | NA                              | 1.22 (0.43–3.53)                 | NA                                                       | NA                              | NA                               |
| Dolasetron vs Ondansetron                                 | 1                   | 0.73 (0.28–1.87)                | 0.74 (0.46–1.18)                 | NA                                                       | NA                              | NA                               |
| Tropisetron vs Ondansetron                                | 1                   | 1.10 (0.33–3.65)                | 0.99 (0.52–1.90)                 | NA                                                       | NA                              | NA                               |
| Ondansetron+DEX vs Ondansetron                            | 1                   | 0.63 (0.09–4.24)                | 0.56 (0.17–1.86)                 | 1                                                        | 0.63 (0.09–4.24)                | 0.66 (0.17–2.59)                 |
| Ramosectron vs Ondansetron                                | 1                   | 1.07 (0.53–2.15)                | 1.25 (0.67–2.34)                 | NA                                                       | NA                              | NA                               |
| Granisetron+DEX vs Ondansetron                            | NA                  | NA                              | 3.23 (1.17–8.95)                 | NA                                                       | NA                              | 4.71 (1.08–20.46)                |
| Dolasetron+DROP vs Ondansetron                            | NA                  | NA                              | 0.99 (0.49–1.99)                 | NA                                                       | NA                              | NA                               |
| Dolasetron vs Granisetron                                 | NA                  | NA                              | 0.61 (0.20–1.81)                 | NA                                                       | NA                              | NA                               |
| Tropisetron vs Granisetron                                | NA                  | NA                              | 0.81 (0.25–2.66)                 | NA                                                       | NA                              | NA                               |
| Ondansetron+DEX vs Granisetron                            | NA                  | NA                              | 0.46 (0.10–2.19)                 | NA                                                       | NA                              | NA                               |
| Ramosectron vs Granisetron                                | NA                  | NA                              | 1.02 (0.31–3.39)                 | NA                                                       | NA                              | NA                               |
| Granisetron+DEX vs Granisetron                            | NA                  | NA                              | 2.64 (0.64–10.92)                | NA                                                       | NA                              | NA                               |
| Dolasetron+DROP vs Granisetron                            | NA                  | NA                              | 0.81 (0.24–2.70)                 | NA                                                       | NA                              | NA                               |
| Tropisetron vs Dolasetron                                 | NA                  | NA                              | 1.34 (0.64–2.77)                 | NA                                                       | NA                              | NA                               |
| Ondansetron+DEX vs Dolasetron                             | NA                  | NA                              | 0.76 (0.22–2.64)                 | NA                                                       | NA                              | NA                               |
| Ramosectron vs Dolasetron                                 | NA                  | NA                              | 1.69 (0.81–3.53)                 | NA                                                       | NA                              | NA                               |
| Granisetron+DEX vs Dolasetron                             | NA                  | NA                              | 4.37 (1.51–12.62)                | NA                                                       | NA                              | NA                               |
| Dolasetron+DROP vs Dolasetron                             | 1                   | 1.33 (0.63–2.77)                | 1.34 (0.69–2.58)                 | NA                                                       | NA                              | NA                               |
| Ondansetron+DEX vs Tropisetron                            | NA                  | NA                              | 0.57 (0.15–2.15)                 | NA                                                       | NA                              | NA                               |
| Ramosectron vs Tropisetron                                | NA                  | NA                              | 1.26 (0.53–3.01)                 | NA                                                       | NA                              | NA                               |
| Granisetron+DEX vs Tropisetron                            | NA                  | NA                              | 3.27 (1.02–10.43)                | NA                                                       | NA                              | NA                               |
| Dolasetron+DROP vs Tropisetron                            | NA                  | NA                              | 1.00 (0.41–2.43)                 | NA                                                       | NA                              | NA                               |
| Ramosectron vs Ondansetron+DEX                            | NA                  | NA                              | 2.22 (0.59–8.42)                 | NA                                                       | NA                              | NA                               |
| Granisetron+DEX vs Ondansetron+DEX                        | 2                   | 8.10 (1.92–34.13)               | 5.75 (1.71–19.34)                | 1                                                        | 7.67 (1.47–40)                  | 7.12 (1.66–30.63)                |
| Dolasetron+DROP vs Ondansetron+DEX                        | NA                  | NA                              | 1.76 (0.46–6.77)                 | NA                                                       | NA                              | NA                               |

|                                                                                                                                                     |                                                         |                   |                     |                                                        |                  |                  |
|-----------------------------------------------------------------------------------------------------------------------------------------------------|---------------------------------------------------------|-------------------|---------------------|--------------------------------------------------------|------------------|------------------|
| Granisetron+DEX vs Ramosetron                                                                                                                       | NA                                                      | NA                | 2.59 (0.81–8.31)    | NA                                                     | NA               | NA               |
| Dolasetron+DROD vs Ramosetron                                                                                                                       | NA                                                      | NA                | 0.79 (0.32–1.95)    | NA                                                     | NA               | NA               |
| Dolasetron+DROD vs Granisetron+DEX                                                                                                                  | NA                                                      | NA                | 0.31 (0.09–0.99)    | NA                                                     | NA               | NA               |
| <b>Between-study heterogeneity</b>                                                                                                                  | <b>0.01</b>                                             |                   |                     | <b>0.02</b>                                            |                  |                  |
| <b>Design-by-treatment interaction model for inconsistency (<math>\chi^2</math>, d.f., P-value, heterogeneity)</b>                                  | <b>3.49 (10, 0.968, 0.01)</b>                           |                   |                     | <b>0.13 (2, 0.938, 0.32)</b>                           |                  |                  |
|                                                                                                                                                     | <b>Delirium (all ages) - 18 RCTs and 3,652 patients</b> |                   |                     | <b>Delirium (children) - 4 RCTs and 1,220 patients</b> |                  |                  |
| Ondansetron vs Placebo                                                                                                                              | 11                                                      | 0.84 (0.53–1.32)  | 0.83 (0.53–1.31)    | 2                                                      | 0.83 (0.19–3.60) | 0.77 (0.23–2.61) |
| Granisetron vs Placebo                                                                                                                              | 3                                                       | 0.29 (0.08–1.08)  | 0.30 (0.08–1.12)    | NA                                                     | NA               | NA               |
| Dolasetron vs Placebo                                                                                                                               | 1                                                       | 3.34 (0.13–85.47) | 3.34 (0.13–85.52)   | NA                                                     | NA               | NA               |
| Tropisetron vs Placebo                                                                                                                              | 3                                                       | 1.45 (0.58–3.66)  | 1.45 (0.58–3.66)    | 2                                                      | 1.35 (0.45–4.01) | 1.38 (0.39–4.8)  |
| Dolasetron+DEX vs Placebo                                                                                                                           | NA                                                      | NA                | 3.54 (0.11–116.45)  | NA                                                     | NA               | NA               |
| Granisetron vs Ondansetron                                                                                                                          | NA                                                      | NA                | 0.36 (0.09–1.43)    | NA                                                     | NA               | NA               |
| Dolasetron vs Ondansetron                                                                                                                           | NA                                                      | NA                | 4.00 (0.15–105.86)  | NA                                                     | NA               | NA               |
| Tropisetron vs Ondansetron                                                                                                                          | NA                                                      | NA                | 1.74 (0.62–4.88)    | NA                                                     | NA               | 1.78 (0.32–9.9)  |
| Dolasetron+DEX vs Ondansetron                                                                                                                       | NA                                                      | NA                | 4.24 (0.13–143.81)  | NA                                                     | NA               | NA               |
| Dolasetron vs Granisetron                                                                                                                           | NA                                                      | NA                | 11.13 (0.34–368.08) | NA                                                     | NA               | NA               |
| Tropisetron vs Granisetron                                                                                                                          | NA                                                      | NA                | 4.85 (0.97–24.11)   | NA                                                     | NA               | NA               |
| Dolasetron+DEX vs Granisetron                                                                                                                       | NA                                                      | NA                | 11.80 (0.28–492.67) | NA                                                     | NA               | NA               |
| Tropisetron vs Dolasetron                                                                                                                           | NA                                                      | NA                | 0.44 (0.01–12.68)   | NA                                                     | NA               | NA               |
| Dolasetron+DEX vs Dolasetron                                                                                                                        | 1                                                       | 1.06 (0.29–3.88)  | 1.06 (0.29–3.88)    | NA                                                     | NA               | NA               |
| Dolasetron+DEX vs Tropisetron                                                                                                                       | NA                                                      | NA                | 2.43 (0.07–90.26)   | NA                                                     | NA               | NA               |
| <b>Between-study heterogeneity</b>                                                                                                                  | <b>0.00</b>                                             |                   |                     | <b>0.18</b>                                            |                  |                  |
| <b>Design-by-treatment interaction model for inconsistency (<math>\chi^2</math>, d.f., P-value, heterogeneity)</b>                                  | <b>0.31 (2, 0.857, 0.00)</b>                            |                   |                     | <b>NA</b>                                              |                  |                  |
| <b>Abbreviations:</b> DEX dexamethasone, DROD droperidol (intravenous), METO Metoclopramide (intravenous), PONV post-operative nausea and vomiting. |                                                         |                   |                     |                                                        |                  |                  |

Appendix 12. Plot of the surface under the cumulative ranking (SUCRA) curves for the 9 treatments included in Arrhythmia.

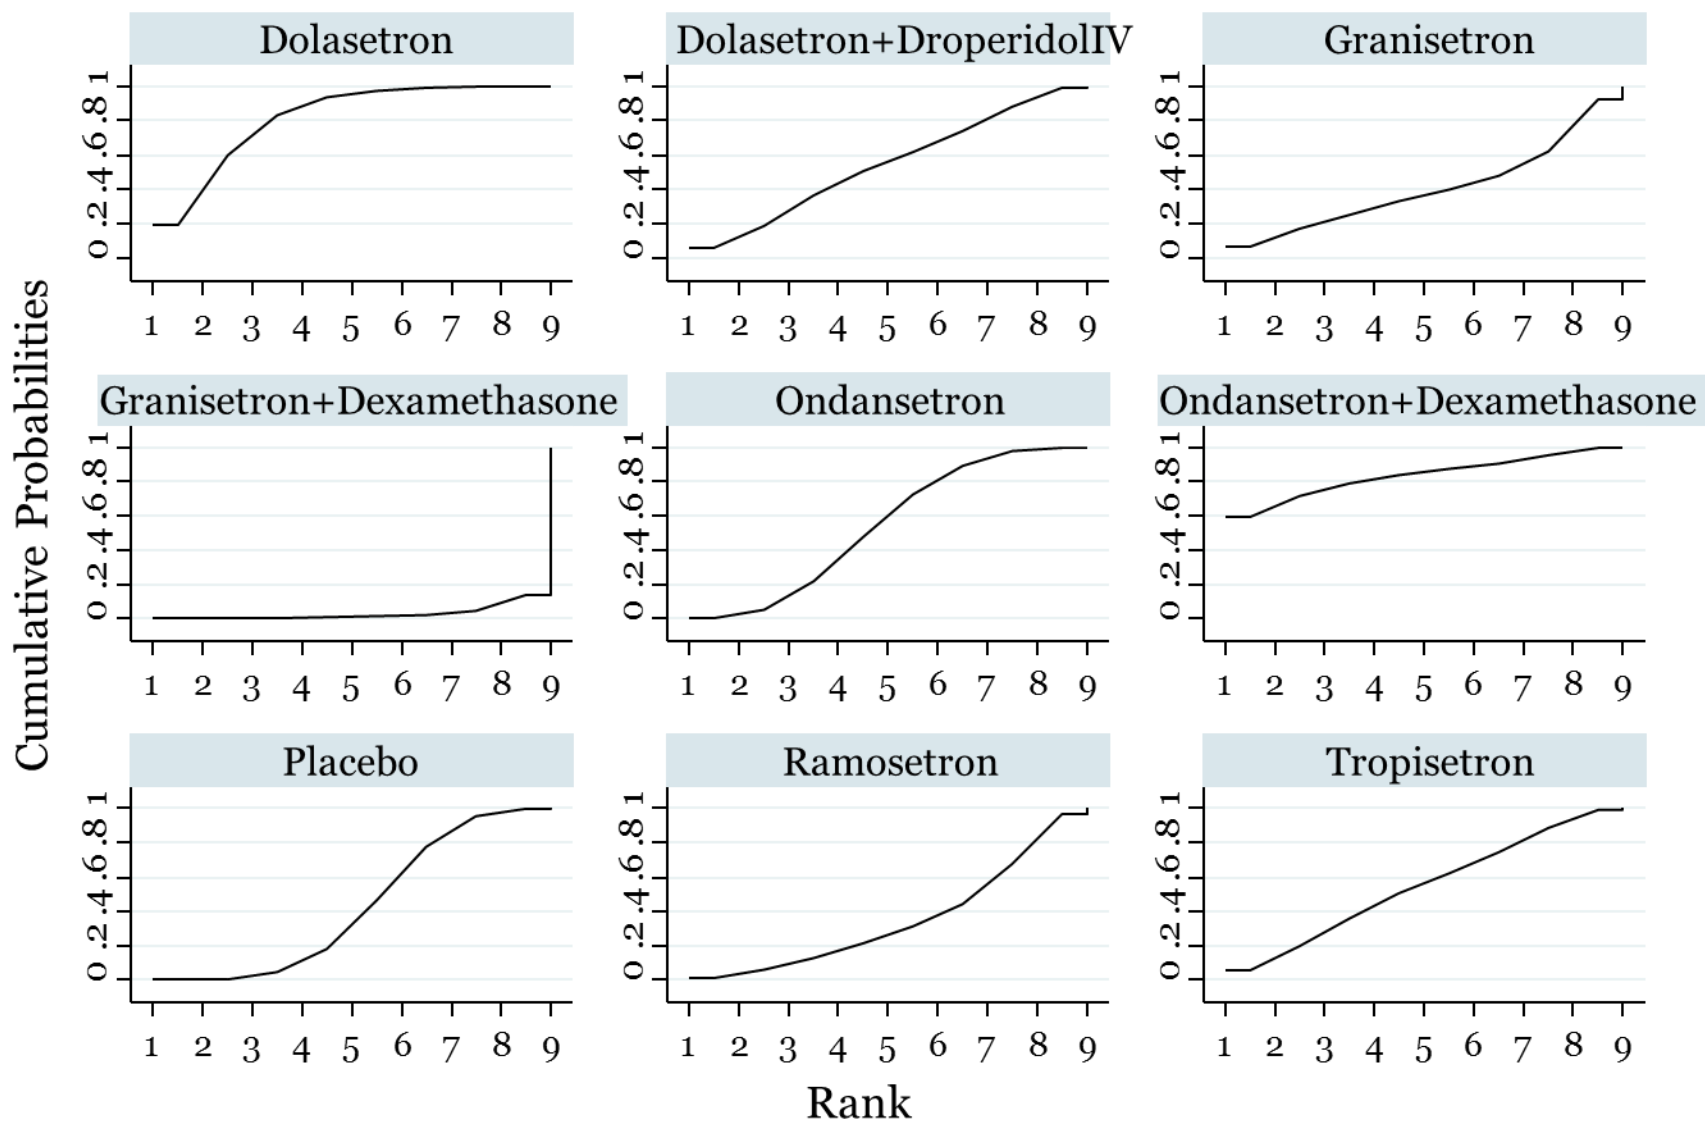



**Appendix 13: Subgroup analysis for Arrhythmia and Delirium**

| <i>Treatment Comparison</i>              | Intra surgery - RCTs only |                                 |                                  | All time periods - RCTs only - sensitivity analysis for Risk of Bias |                                 |                                  | All time periods - all study designs |                                 |                                  |
|------------------------------------------|---------------------------|---------------------------------|----------------------------------|----------------------------------------------------------------------|---------------------------------|----------------------------------|--------------------------------------|---------------------------------|----------------------------------|
|                                          | <i># of studies</i>       | <i>MA estimate: OR (95% CI)</i> | <i>NMA estimate: OR (95% CI)</i> | <i># of studies</i>                                                  | <i>MA estimate: OR (95% CI)</i> | <i>NMA estimate: OR (95% CI)</i> | <i># of studies</i>                  | <i>MA estimate: OR (95% CI)</i> | <i>NMA estimate: OR (95% CI)</i> |
|                                          | <b>Arrhythmia</b>         |                                 |                                  |                                                                      |                                 |                                  |                                      |                                 |                                  |
| Ondansetron vs Placebo                   | 16                        | 0.89 (0.65-1.23)                | 0.87 (0.64-1.2)                  | 18                                                                   | 0.93 (0.7-1.23)                 | 0.92 (0.69-1.21)                 |                                      |                                 |                                  |
| Granisetron vs Placebo                   | 1                         | 3.12 (0.13-77.52)               | 3.12 (0.13-77.37)                | 1                                                                    | 3.12 (0.13-77.52)               | 3.12 (0.13-77.36)                |                                      |                                 |                                  |
| Dolasetron vs Placebo                    | 4                         | 0.56 (0.34-0.92)                | 0.57 (0.35-0.93)                 | 7                                                                    | 0.67 (0.45-1)                   | 0.68 (0.46-1.01)                 |                                      |                                 |                                  |
| Tropisetron vs Placebo                   | 4                         | 0.93 (0.48-1.79)                | 0.9 (0.49-1.66)                  | 4                                                                    | 0.93 (0.48-1.79)                | 0.91 (0.49-1.68)                 |                                      |                                 |                                  |
| Ondansetron+Dexamethasone vs Placebo     | 2                         | 0.78 (0.19-3.14)                | 0.51 (0.16-1.66)                 | 2                                                                    | 0.78 (0.19-3.14)                | 0.52 (0.16-1.68)                 |                                      |                                 |                                  |
| Ramosetron vs Placebo                    | 1                         | 1.48 (0.73-3)                   | 1.48 (0.73-3)                    | 1                                                                    | 1.36 (0.66-2.8)                 | 1.15 (0.61-2.15)                 |                                      |                                 |                                  |
| Granisetron+Dexamethasone vs Placebo     | 2                         | 2.63 (0.75-9.29)                | 2.95 (1.1-7.91)                  | 2                                                                    | 2.63 (0.75-9.29)                | 2.96 (1.11-7.94)                 |                                      |                                 |                                  |
| Dolasetron+DroperidolIV vs Placebo       | 1                         | 0.91 (0.45-1.84)                | 0.84 (0.44-1.62)                 | 1                                                                    | 0.91 (0.45-1.84)                | 0.91 (0.48-1.73)                 |                                      |                                 |                                  |
| Granisetron vs Ondansetron               | NA                        | NA                              | 3.56 (0.14-89.88)                | NA                                                                   | NA                              | 3.4 (0.14-85.46)                 |                                      |                                 |                                  |
| Dolasetron vs Ondansetron                | 1                         | 0.73 (0.28-1.87)                | 0.66 (0.38-1.14)                 | 1                                                                    | 0.73 (0.28-1.87)                | 0.74 (0.46-1.18)                 |                                      |                                 |                                  |
| Tropisetron vs Ondansetron               | 1                         | 1.1 (0.33-3.65)                 | 1.03 (0.53-1.99)                 | 1                                                                    | 1.1 (0.33-3.65)                 | 0.99 (0.52-1.9)                  |                                      |                                 |                                  |
| Ondansetron+Dexamethasone vs Ondansetron | 1                         | 0.63 (0.09-4.24)                | 0.58 (0.17-1.94)                 | 1                                                                    | 0.63 (0.09-4.24)                | 0.56 (0.17-1.86)                 |                                      |                                 |                                  |
| Ramosetron vs Ondansetron                | NA                        | NA                              | 1.69 (0.78-3.67)                 | 1                                                                    | 1.07 (0.53-2.15)                | 1.25 (0.67-2.34)                 |                                      |                                 |                                  |
| Granisetron+Dexamethasone vs Ondansetron | NA                        | NA                              | 3.38 (1.21-9.42)                 | NA                                                                   | NA                              | 3.23 (1.17-8.95)                 |                                      |                                 |                                  |
| Dolasetron+DroperidolIV vs Ondansetron   | NA                        | NA                              | 0.96 (0.47-1.98)                 | NA                                                                   | NA                              | 0.99 (0.49-1.99)                 |                                      |                                 |                                  |
| Dolasetron vs Granisetron                | NA                        | NA                              | 0.18 (0.01-4.75)                 | NA                                                                   | NA                              | 0.22 (0.01-5.54)                 |                                      |                                 |                                  |
| Tropisetron vs Granisetron               | NA                        | NA                              | 0.29 (0.01-7.59)                 | NA                                                                   | NA                              | 0.29 (0.01-7.66)                 |                                      |                                 |                                  |
| Ondansetron+Dexamethasone vs Granisetron | NA                        | NA                              | 0.16 (0.01-5.01)                 | NA                                                                   | NA                              | 0.17 (0.01-5.07)                 |                                      |                                 |                                  |
| Ramosetron vs Granisetron                | NA                        | NA                              | 0.47 (0.02-12.72)                | NA                                                                   | NA                              | 0.37 (0.01-9.7)                  |                                      |                                 |                                  |
| Granisetron+Dexamethasone vs Granisetron | NA                        | NA                              | 0.95 (0.03-27.27)                | NA                                                                   | NA                              | 0.95 (0.03-27.38)                |                                      |                                 |                                  |
| Dolasetron+DroperidolIV vs Granisetron   | NA                        | NA                              | 0.27 (0.01-7.17)                 | NA                                                                   | NA                              | 0.29 (0.01-7.7)                  |                                      |                                 |                                  |
| Tropisetron vs Dolasetron                | NA                        | NA                              | 1.56 (0.72-3.4)                  | NA                                                                   | NA                              | 1.34 (0.64-2.77)                 |                                      |                                 |                                  |
| Ondansetron+Dexamethasone vs Dolasetron  | NA                        | NA                              | 0.88 (0.25-3.17)                 | NA                                                                   | NA                              | 0.76 (0.22-2.64)                 |                                      |                                 |                                  |
| Ramosetron vs Dolasetron                 | NA                        | NA                              | 2.57 (1.09-6.06)                 | NA                                                                   | NA                              | 1.69 (0.81-3.53)                 |                                      |                                 |                                  |
| Granisetron+Dexamethasone vs Dolasetron  | NA                        | NA                              | 5.13 (1.72-15.37)                | NA                                                                   | NA                              | 4.37 (1.51-12.62)                |                                      |                                 |                                  |
| Dolasetron+DroperidolIV vs Dolasetron    | 1                         | 1.33 (0.63-2.77)                | 1.46 (0.75-2.87)                 | NA                                                                   | 1.33 (0.63-2.77)                | 1.34 (0.69-2.58)                 |                                      |                                 |                                  |
| Ondansetron+Dexamethasone vs Tropisetron | NA                        | NA                              | 0.57 (0.15-2.14)                 | NA                                                                   | NA                              | 0.57 (0.15-2.15)                 |                                      |                                 |                                  |
| Ramosetron vs Tropisetron                | NA                        | NA                              | 1.64 (0.64-4.21)                 | NA                                                                   | NA                              | 1.26 (0.53-3.01)                 |                                      |                                 |                                  |
| Granisetron+Dexamethasone vs Tropisetron | NA                        | NA                              | 3.29 (1.03-10.49)                | NA                                                                   | NA                              | 3.27 (1.02-10.43)                |                                      |                                 |                                  |
| Dolasetron+DroperidolIV vs Tropisetron   | NA                        | NA                              | 0.94 (0.38-2.3)                  | NA                                                                   | NA                              | 1 (0.41-2.43)                    |                                      |                                 |                                  |
| Ramosetron vs                            | NA                        | NA                              | 2.9 (0.73-11.55)                 | NA                                                                   | NA                              | 2.22 (0.59-8.42)                 |                                      |                                 |                                  |

|                                                                                                                    |                 |                   |                              |    |                   |                               |    |                   |                              |
|--------------------------------------------------------------------------------------------------------------------|-----------------|-------------------|------------------------------|----|-------------------|-------------------------------|----|-------------------|------------------------------|
| Ondansetron+Dexamethasone                                                                                          |                 |                   |                              |    |                   |                               |    |                   |                              |
| Granisetron+Dexamethasone vs Ondansetron+Dexamethasone                                                             | 2               | 8.1 (1.92-34.13)  | 5.8 (1.73-19.51)             | 2  | 8.1 (1.92-34.13)  | 5.75 (1.71-19.34)             |    |                   |                              |
| Dolasetron+DroperidolIV vs Ondansetron+Dexamethasone                                                               | NA              | NA                | 1.66 (0.43-6.4)              | NA | NA                | 1.76 (0.46-6.77)              |    |                   |                              |
| Granisetron+Dexamethasone vs Ramosetron                                                                            | NA              | NA                | 2 (0.59-6.73)                | NA | NA                | 2.59 (0.81-8.31)              |    |                   |                              |
| Dolasetron+DroperidolIV vs Ramosetron                                                                              | NA              | NA                | 0.57 (0.22-1.5)              | NA | NA                | 0.79 (0.32-1.95)              |    |                   |                              |
| Dolasetron+DroperidolIV vs Granisetron+Dexamethasone                                                               | NA              | NA                | 0.29 (0.09-0.93)             | NA | NA                | 0.31 (0.09-0.99)              |    |                   |                              |
| <b>Between-study heterogeneity</b>                                                                                 |                 |                   | <b>0.00</b>                  |    |                   | <b>0.00</b>                   |    |                   |                              |
| <b>Design-by-treatment interaction model for inconsistency (<math>\chi^2</math>, d.f., P-value, heterogeneity)</b> |                 |                   | <b>2.88 (9, 0.969, 0.04)</b> |    |                   | <b>3.46 (10, 0.968, 0.01)</b> |    |                   |                              |
|                                                                                                                    | <b>Delirium</b> |                   |                              |    |                   |                               |    |                   |                              |
| Ondansetron vs Placebo                                                                                             | 10              | 0.80 (0.50-1.28)  | 0.80 (0.5-1.27)              | 10 | 0.85 (0.54-1.35)  | 0.85 (0.54-1.35)              | 12 | 0.85 (0.54-1.34)  | 0.85 (0.54-1.34)             |
| Granisetron vs Placebo                                                                                             | 2               | 0.17 (0.02-1.51)  | 0.19 (0.02-1.64)             | 1  | 0.1 (0.01-1.92)   | 0.1 (0.01-1.92)               | 3  | 0.29 (0.08-1.08)  | 0.3 (0.08-1.12)              |
| Dolasetron vs Placebo                                                                                              | 1               | 3.34 (0.13-85.47) | 3.34 (0.13-85.56)            | 1  | 3.34 (0.13-85.47) | 3.34 (0.13-85.54)             | 1  | 3.34 (0.13-85.47) | 3.34 (0.13-85.54)            |
| Tropisetron vs Placebo                                                                                             | 2               | 1.35 (0.45-4.01)  | 1.35 (0.45-4.01)             | 3  | 1.45 (0.58-3.66)  | 1.45 (0.58-3.66)              | 3  | 1.45 (0.58-3.66)  | 1.45 (0.58-3.66)             |
| Dolasetron+DEX vs Placebo                                                                                          | NA              | NA                | 0.24 (0.03-2.15)             | NA | NA                | 3.54 (0.11-116.48)            | NA | NA                | 3.54 (0.11-116.46)           |
| Granisetron vs Ondansetron                                                                                         | NA              | NA                | 4.2 (0.16-111.21)            | NA | NA                | 0.12 (0.01-2.35)              | NA | NA                | 0.35 (0.09-1.4)              |
| Dolasetron vs Ondansetron                                                                                          | NA              | NA                | 1.7 (0.52-5.56)              | NA | NA                | 3.93 (0.15-103.99)            | NA | NA                | 3.91 (0.15-103.41)           |
| Tropisetron vs Ondansetron                                                                                         | NA              | NA                | 17.46 (0.36-855.21)          | NA | NA                | 1.71 (0.61-4.8)               | NA | NA                | 1.7 (0.61-4.76)              |
| Dolasetron+DEX vs Ondansetron                                                                                      | NA              | NA                | 7.05 (0.63-78.61)            | NA | NA                | 4.17 (0.12-141.28)            | NA | NA                | 4.15 (0.12-140.47)           |
| Dolasetron vs Granisetron                                                                                          | NA              | NA                | 0.4 (0.01-12.37)             | NA | NA                | 33.35 (0.41-2683.9)           | NA | NA                | 11.12 (0.34-367.78)          |
| Tropisetron vs Granisetron                                                                                         | NA              | NA                | NA                           | NA | NA                | 14.52 (0.66-321.2)            | NA | NA                | 4.84 (0.97-24.09)            |
| Dolasetron+DEX vs Granisetron                                                                                      | NA              | NA                | NA                           | NA | NA                | 35.35 (0.36-3434.22)          | NA | NA                | 11.79 (0.28-492.21)          |
| Tropisetron vs Dolasetron                                                                                          | NA              | NA                | NA                           | NA | NA                | 0.44 (0.01-12.68)             | NA | NA                | 0.44 (0.01-12.69)            |
| Dolasetron+DEX vs Dolasetron                                                                                       | NA              | NA                | NA                           | 1  | 1.06 (0.29-3.88)  | 1.06 (0.29-3.88)              | 1  | 1.06 (0.29-3.88)  | 1.06 (0.29-3.88)             |
| Dolasetron+DEX vs Tropisetron                                                                                      | NA              | NA                | NA                           | NA | NA                | 2.43 (0.07-90.28)             | NA | NA                | 2.43 (0.07-90.26)            |
| <b>Between-study heterogeneity</b>                                                                                 |                 |                   | <b>0.00</b>                  |    |                   | <b>0.00</b>                   |    |                   | <b>0.00</b>                  |
| <b>Design-by-treatment interaction model for inconsistency (<math>\chi^2</math>, d.f., P-value, heterogeneity)</b> |                 |                   | <b>0.63 (2, 0.729, 0.00)</b> |    |                   | <b>NA</b>                     |    |                   | <b>0.32 (2, 0.851, 0.00)</b> |

|                |  |  |  |  |  |  |  |  |  |
|----------------|--|--|--|--|--|--|--|--|--|
| heterogeneity) |  |  |  |  |  |  |  |  |  |
|----------------|--|--|--|--|--|--|--|--|--|

**Appendix 14. Network meta-analysis results for Delirium.**

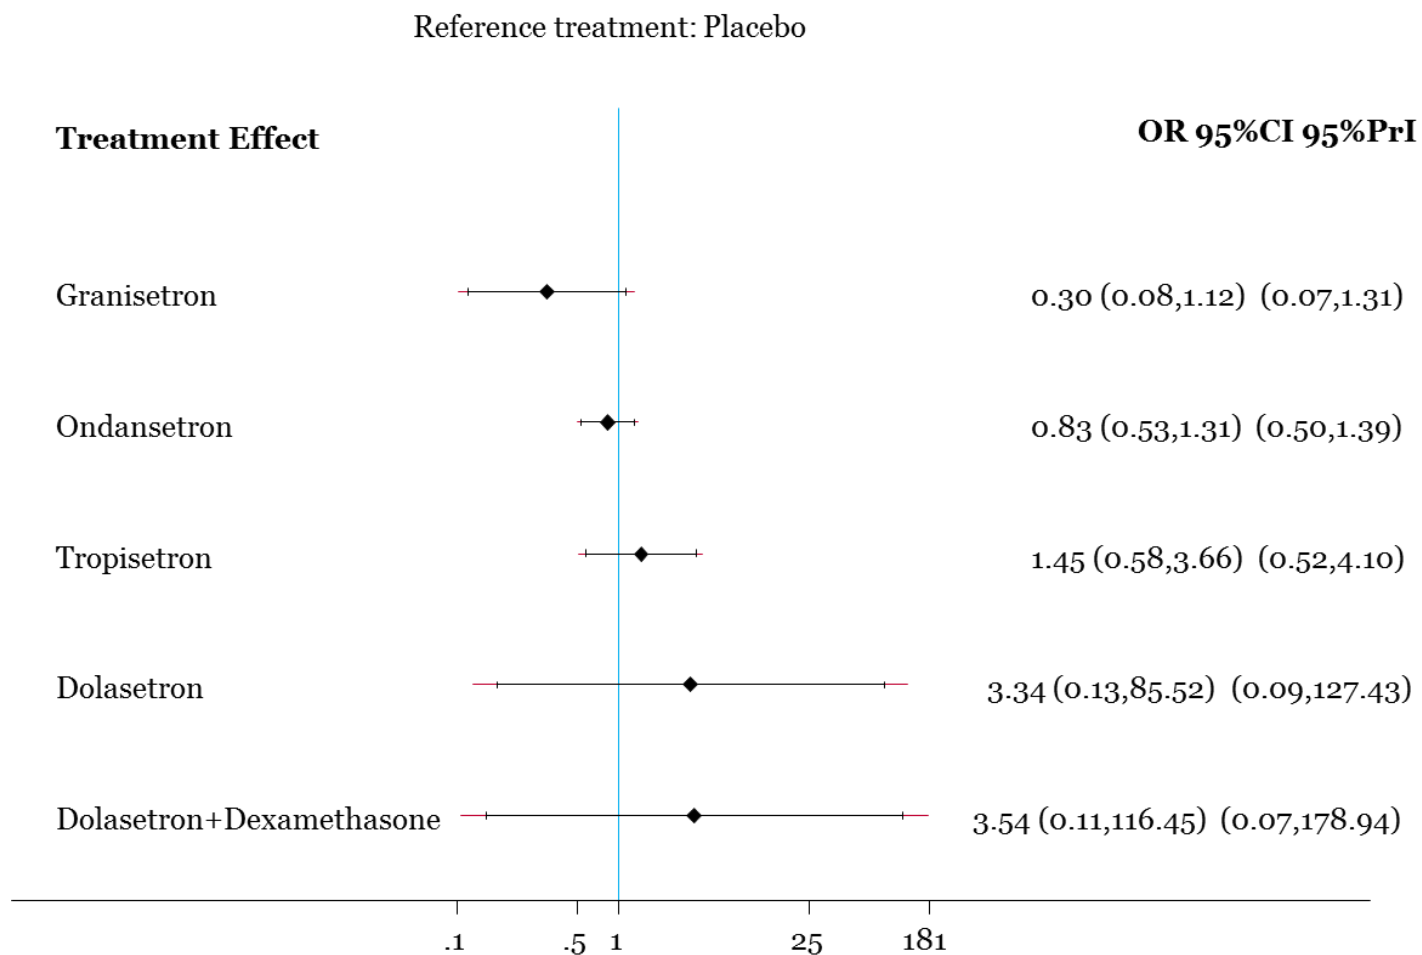

Network estimates using the random effects model and a common within-network heterogeneity

All treatments are compared to placebo. The black horizontal lines represent the 95% confidence intervals (CI) of the summary treatment effects and red horizontal lines the 95% predictive intervals (PrI). The results are presented on the odds ratio scale.

## Appendix 15. Definitions of delirium

| Study                             | Definition of delirium                                                                                                                                                                                  |
|-----------------------------------|---------------------------------------------------------------------------------------------------------------------------------------------------------------------------------------------------------|
| Jain, 2009                        | Confusion unspecified                                                                                                                                                                                   |
| Piper, 2008                       | Restlessness, agitation unspecified                                                                                                                                                                     |
| Sagir, 2007                       | Agitation unspecified                                                                                                                                                                                   |
| Wagner, 2007                      | Emergence delirium unspecified                                                                                                                                                                          |
| Tosun, 2006                       | Agitation unspecified                                                                                                                                                                                   |
| Khalil, 2005                      | Agitation and aggressive behavior unspecified                                                                                                                                                           |
| Kathirvel, 2001                   | Confusion/Dizziness unspecified                                                                                                                                                                         |
| Jensen, 2000                      | Restlessness unspecified                                                                                                                                                                                |
| McCall, 1999                      | Emergence was scored as 'where 1 = calm emergence, 2 = slight agitation or delirium, 3 = moderate agitation or delirium, and 4 = extreme agitation or delirium'; Delirium was considered a score of 3,4 |
| Sinha, 1999                       | Confusion unspecified                                                                                                                                                                                   |
| Koivuranta, 1997                  | Restlessness unspecified                                                                                                                                                                                |
| Patel, 1997                       | Anxiety/agitation unspecified                                                                                                                                                                           |
| Kovac, 1996 (CR: Pearman, 1994c)  | Anxiety/agitation unspecified                                                                                                                                                                           |
| Paech, 1995                       | Agitation unspecified                                                                                                                                                                                   |
| Kovac, 1992 (CR: Mckenzie, 1993a) | Anxiety/agitation unspecified                                                                                                                                                                           |

Appendix 16. Plot of the surface under the cumulative ranking (SUCRA) curves for the 6 treatments included in Delirium.

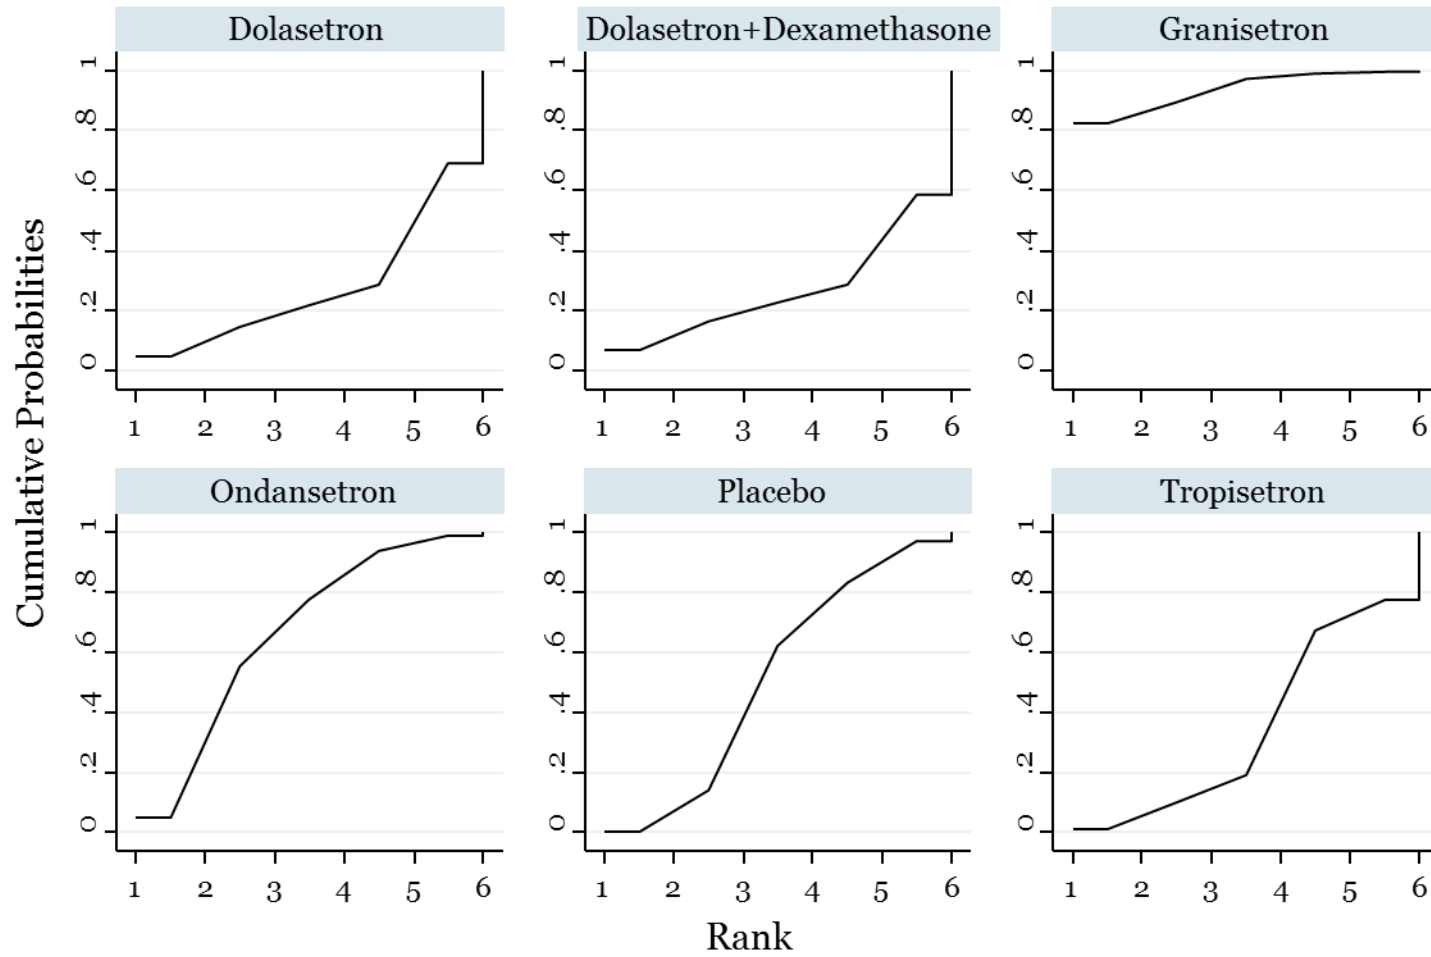

## Appendix 17. Included studies in our review versus previous systematic reviews

| Study                                     | Tang, 2012 (NMA) | Carlisle, 2006 (Cochrane) | Rawlinson, 2012 | # of patients |
|-------------------------------------------|------------------|---------------------------|-----------------|---------------|
| <i>Randomized clinical trials (n=112)</i> |                  |                           |                 |               |
| Choi, 2012                                | NO               | NO                        | NO              | 120           |
| Wang, 2012                                | NO               | NO                        | NO              | 130           |
| Ekinçi, 2011                              | NO               | NO                        | NO              | 100           |
| El-deeb, 2011b                            | NO               | NO                        | NO              | 160           |
| Gan, 2011                                 | NO               | NO                        | NO              | 619           |
| Gupta, 2011                               | NO               | NO                        | NO              | 136           |
| Park, 2011                                | NO               | NO                        | NO              | 90            |
| Ryu, 2011                                 | NO               | NO                        | NO              | 124           |
| Sahoo, 2011                               | NO               | NO                        | NO              | 52            |
| Bilgin, 2010                              | NO               | NO                        | NO              | 160           |
| Choi, 2010                                | NO               | NO                        | NO              | 279           |
| Jee, 2010                                 | NO               | NO                        | NO              | 100           |
| Jokela, 2010                              | NO               | NO                        | NO              | 80            |
| Mehta, 2010                               | NO               | NO                        | NO              | 80            |
| Shakya, 2010                              | NO               | NO                        | NO              | 80            |
| Singla, 2010                              | NO               | NO                        | NO              | 702           |
| Feng, 2009                                | NO               | NO                        | NO              | 192           |
| Jain, 2009                                | NO               | NO                        | NO              | 87            |
| Riad, 2009                                | NO               | NO                        | NO              | 100           |
| Rosow, 2009                               | NO               | NO                        | NO              | 244           |
| Candiotti, 2008                           | NO               | NO                        | NO              | 546           |
| Choi, 2008                                | NO               | NO                        | NO              | 94            |
| Contreras-Dominguez, 2008                 | YES              | NO                        | NO              | 150           |
| Kovac, 2008                               | NO               | NO                        | NO              | 544           |
| Owczuk, 2008                              | NO               | NO                        | NO              | 71            |
| Piper, 2008                               | YES              | NO                        | NO              | 83            |
| Said-Ahmed, 2008                          | NO               | NO                        | NO              | 50            |
| Bestas, 2007                              | YES              | NO                        | NO              | 90            |
| Diemunsch, 2007                           | NO               | NO                        | NO              | 892           |
| Gan, 2007                                 | NO               | NO                        | NO              | 766           |
| Han, 2007                                 | NO               | NO                        | NO              | 80            |
| Lee, 2007                                 | NO               | NO                        | NO              | 86            |
| Oksuz, 2007                               | NO               | NO                        | NO              | 75            |
| Rusch, 2007                               | NO               | NO                        | NO              | 228           |
| Sagir, 2007                               | NO               | NO                        | NO              | 80            |
| Sandhu, 2007                              | NO               | NO                        | NO              | 80            |
| Siddik-Sayyid, 2007                       | NO               | NO                        | NO              | 129           |
| Bridge, 2006                              | NO               | NO                        | NO              | 194           |
| Chan, 2006                                | NO               | NO                        | NO              | 394           |
| Kelsaka, 2006                             | NO               | NO                        | NO              | 50            |
| Sarvela, 2006                             | NO               | NO                        | NO              | 87            |
| Tosun, 2006                               | NO               | YES                       | NO              | 125           |

|                                |     |     |     |      |
|--------------------------------|-----|-----|-----|------|
| D'Angelo, 2005                 | YES | NO  | NO  | 121  |
| Gan, 2005                      | NO  | NO  | NO  | 176  |
| Khalil, 2005                   | NO  | NO  | NO  | 670  |
| Kocamanoglu, 2005              | YES | NO  | NO  | 150  |
| Kontrimaviciute, 2005          | NO  | NO  | NO  | 34   |
| Pirat, 2005                    | YES | NO  | NO  | 150  |
| Treschan, 2005                 | NO  | NO  | NO  | 142  |
| White, 2005 <sup>f</sup>       | NO  | NO  | NO  | 372  |
| Apfel, 2004 (CR: Jokela, 2009) | NO  | YES | YES | 260  |
| Binstock, 2004                 | NO  | NO  | NO  | 101  |
| Eberhart, 2004                 | NO  | NO  | NO  | 304  |
| Hanaoka, 2004                  | YES | NO  | NO  | 315  |
| Samakarndi, 2004               | NO  | NO  | NO  | 80   |
| Charuluxananan, 2003           | NO  | YES | NO  | 180  |
| Loewen, 2003                   | NO  | YES | NO  | 71   |
| O'Brien, 2003                  | NO  | YES | NO  | 150  |
| Argiriadou, 2002               | NO  | YES | NO  | 87   |
| Gurkan, 2002                   | NO  | NO  | NO  | 150  |
| Dabbous, 2001                  | NO  | NO  | NO  | 173  |
| Kathirvel, 2001                | YES | YES | NO  | 152  |
| Subramaniam, 2001              | NO  | YES | NO  | 135  |
| Ahmed, 2000                    | NO  | YES | NO  | 139  |
| Charuluxananan, 2000           | NO  | NO  | NO  | 80   |
| Jensen, 2000                   | NO  | YES | NO  | 71   |
| Kreiser, 2000                  | NO  | YES | NO  | 31   |
| Philip, 2000                   | YES | YES | NO  | 1030 |
| Zarate, 2000                   | NO  | YES | NO  | 200  |
| Koivuranta, 1999               | NO  | YES | NO  | 88   |
| McCall, 1999                   | NO  | YES | NO  | 100  |
| Sinha, 1999                    | YES | YES | NO  | 40   |
| Tsui, 1999                     | NO  | YES | NO  | 121  |
| Diemunsch, 1998                | YES | YES | NO  | 793  |
| Goodarzi, 1998                 | NO  | YES | NO  | 81   |
| Hamid, 1998                    | NO  | YES | NO  | 71   |
| Morris, 1998                   | NO  | YES | NO  | 1044 |
| Scholz, 1998                   | YES | YES | NO  | 842  |
| Tramer, 1998                   | NO  | YES | NO  | 157  |
| Diemunsch, 1997b               | NO  | YES | NO  | 281  |
| Diemunsch, 1997c               | NO  | NO  | NO  | 337  |
| Graczyk, 1997                  | NO  | NO  | NO  | 635  |
| Klockgether-Radke, 1997        | NO  | YES | NO  | 120  |
| Koivuranta, 1997               | NO  | YES | NO  | 439  |
| Korttila, 1997                 | YES | YES | NO  | 517  |
| Kovac, 1997                    | NO  | NO  | NO  | 620  |
| Mikawa, 1997                   | YES | YES | NO  | 200  |
| Monagle, 1997                  | NO  | YES | NO  | 91   |
| Morton, 1997                   | NO  | YES | NO  | 427  |
| Patel, 1997                    | NO  | NO  | NO  | 429  |



|                                                    |     |     |    |     |
|----------------------------------------------------|-----|-----|----|-----|
| Purhonen, 1997                                     | YES | YES | NO | 146 |
| Rung, 1997                                         | NO  | NO  | NO | 121 |
| Scuderi, 1997                                      | NO  | YES | NO | 160 |
| Taylor, 1997                                       | NO  | NO  | NO | 523 |
| Ulusoy, 1997                                       | NO  | NO  | NO | 40  |
| Warriner, 1997                                     | YES | YES | NO | 374 |
| Ali-melkkila, 1996                                 | NO  | NO  | NO | 120 |
| Capouet, 1996                                      | YES | YES | NO | 385 |
| Kovac, 1996 (CR: Pearman, 1994c)                   | YES | YES | NO | 468 |
| Naguib, 1996                                       | YES | YES | NO | 132 |
| Rose, 1996a                                        | NO  | YES | NO | 136 |
| Desilva, 1995                                      | NO  | NO  | NO | 286 |
| Litman, 1995                                       | NO  | YES | NO | 57  |
| Paech, 1995                                        | NO  | YES | NO | 259 |
| Paxton, 1995a                                      | NO  | YES | NO | 60  |
| Kaufmann, 1994                                     | YES | YES | NO | 286 |
| Ummenhofer, 1994                                   | NO  | YES | NO | 200 |
| Dupeyron, 1993                                     | NO  | YES | NO | 243 |
| Helmers, 1993                                      | NO  | YES | NO | 923 |
| Raphael, 1993                                      | NO  | YES | NO | 123 |
| Du Pen, 1992 (CR: Scuderi, 1993)                   | NO  | NO  | NO | 500 |
| Kovac, 1992 (CRs: McKenzie, 1993a; Pearman, 1994a) | NO  | NO  | NO | 580 |
| <i>Non randomized clinical trials (n=2)</i>        |     |     |    |     |
| Charbit, 2005                                      | NO  | NO  | NO | 85  |
| Lerman, 1996                                       | NO  | YES | NO | 28  |
| <i>Controlled before-after study (n=1)</i>         |     |     |    |     |
| Wagner, 2007                                       | NO  | NO  | NO | 66  |
| <b>Total included studies</b>                      | 66  | 217 | 4  |     |

**Note:** †Unpublished data (White, 2005).

**Abbreviations:** CR, companion report; NMA, network meta-analysis; NO, study wasn't included in review; YES, study was included in review.
